# Supplementary material for: Role of filamentous fungi in migration of radioactive cesium in the Fukushima forest soil environment
Source: Royal Society of Chemistry journal article supplement (doi:10.1039/c9em00046a), 2019-01-01
Supplement: c9em00046a1.xlsx [file c9em00046a1.xlsx]

## Sheet: Table 1
	Mushroom			Activity (Bq/kg)		TF
	Species	Dry weight (g)		Mushroom	Soil
	Antrodia sp.	0.71	Cs-137	3.4×105	1.4×105	2.4
	Boletaceae sp.	1.98	Cs-137	1.6×106	5.3×104	31
	Cortinarius violaceus	0.25	Cs-137	5.8×105	9.3×104	6.2
	Entoloma sarcopum	3.31	Cs-137	1.6×104	1.8×105	9.0×10-2
	Entoloma sarcopum	1.98	Cs-137	8.3×104	8.5×104	9.7×10-1
	Entoloma sp.	1.38	Cs-137	1.8×104	6.1×105	2.9×10-2
	Gomphus floccosus	0.45	Cs-137	6.2×104	1.3×105	4.7×10-1
	Hydnum sp.	0.53	Cs-137	2.2×104	4.3×104	5.1×10-1
	Hydnum sp.	1.19	Cs-137	3.8×104	1.4×105	2.7×10-1
	Hydnum sp.	1.14	Cs-137	2.2×104	5.0×104	4.4×10-1
	Hygrocybe psittacina	0.17	Cs-137	1.2×107	3.3×105	37
	Hygrocybe psittacina	4.37	Cs-137	7.3×104	1.0×105	7.1×10-1
	Hygrocybe psittacina	2.04	Cs-137	1.1×105	9.3×104	1.1
	Hygrocybe psittacina	0.64	Cs-137	6.9×104	1.2×105	6.0×10-1
	Hygrocybe psittacina	0.83	Cs-137	8.4×104	1.9×105	4.4×10-1
	Hypholoma sublateritium	5.85	Cs-137	5.2×104	3.6×104	1.4
	Lactarius chrysorrheus	0.26	Cs-137	1.6×106	9.3×104	17
	Lactarius laeticolor	3.5	Cs-137	1.2×105	2.1×105	5.8×10-1
	Lactarius laeticolor	7.29	Cs-137	3.2×104	9.1×104	3.5×10-1
	Lactarius laeticolor	1.13	Cs-137	8.3×104	6.9×104	1.2
	Lactarius laeticolor	1.23	Cs-137	5.4×104	7.7×104	7.1×10-1
	Lactarius sp.	1.29	Cs-137	8.2×104	1.4×105	5.9×10-1
	Lycoperdon perlatum Pers.	1.63	Cs-137	2.6×104	4.5×104	5.6×10-1
	Lycoperdon perlatum Pers.	0.49	Cs-137	1.3×104	1.2×105	1.1×10-1
	Lyophyllum sp.	7.75	Cs-137	8.5×103	4.0×104	2.1×10-1
	Lyophyllum sp.	0.86	Cs-137	4.0×104	6.8×104	5.9×10-1
	Lyophyllum sp.	0.45	Cs-137	2.0×104	4.2×104	4.7×10-1
	Lyophyllum sp.	4.23	Cs-137	5.4×104	1.3×105	4.3×10-1
	Lyophyllum sp.	1.08	Cs-137	4.8×104	6.8×104	7.1×10-1
	Mycena sp.	0.26	Cs-137	1.3×106	7.9×104	16
	Mycena sp.	0.18	Cs-137	1.1×106	7.4×104	14
	Russula delica	0.27	Cs-137	2.5×106	2.2×104	1.1×102
	Russula sp.	0.25	Cs-137	6.3×105	3.7×104	17
	Russulaceae sp	2.48	Cs-137	5.4×104	3.6×104	1.5
	Russulaceae sp.	0.55	Cs-137	1.6×107	1.7×105	92
	Russulaceae sp.	0.62	Cs-137	9.9×104	3.2×105	3.0×10-1
	Russulaceae sp.	0.46	Cs-137	7.3×105	1.0×105	7.2
	Suillus sp.	1.11	Cs-137	2.2×105	6.7×104	3.3
	Tyromyces chioneus (Fr.) P. Karst.	0.27	Cs-137	1.8×105	6.5×103	27

## Sheet: Table 2
Species	TFagar	Dry weight (g)	Species	TFagar	Dry weight (g)	Species	TFagar	Dry weight (g)
Hypholoma	468.754	0.03344	Gloiocephala	85.4554	0.05451	Armillaria	59.0491	0.06694
Phallus	112.629	0.07158	Rhizopogon	178.324	0.026	Pseudomerulius	121.833	0.03214
Marasmiellus	247.664	0.03233	Dictyopanus	69.0772	0.06681	Panus	127.275	0.03072
Leucocoprinus	188.401	0.03765	Agaricus	138.175	0.03336	Suillus	54.1728	0.07147
Unknown	70.267	0.09985	Unknown	128.629	0.03581	Unknown	76.2283	0.05068
Lentinula	155.404	0.0435	Marasmius	117.118	0.03924	Unknown	69.0955	0.05577
Agaricus	138.818	0.04784	Unknown	74.9727	0.06057	Suiilus	78.6921	0.04887
Mar	60.8039	0.10864	Psathyrella	88.5301	0.05125	Xeromphalina	119.311	0.03221
Crepidotus	102.621	0.06071	Lepiota	102.071	0.04438	Marasmiellus	99.7694	0.03836
Lactocollybia	211.075	0.02894	Suillus	80.5944	0.05613	Panellus	172.152	0.02216
Coprinus	145.131	0.04198	Pleurotus	243.352	0.01855	Unknown	55.3152	0.06887
Stropharia	138.873	0.04173	Lactocollybia	165.833	0.02721	Psathyrella	128.54	0.02944
Agaricus	108.279	0.05348	Ompharina	106.471	0.04195	Unknown	73.1518	0.05158
Favolaschia	80.8172	0.07076	Unknown	57.7372	0.07731	Tricholoma	65.1479	0.05773
Marasmius	199.184	0.02858	Marasmius	115.302	0.03788	Gymnopilus	90.8202	0.04095
Melanotus?	124.666	0.04493	Armillaria	53.1661	0.08198	Buchwaldoboletus	109.706	0.03316
Pleurotus	139.242	0.04017	Oudemansiella	96.4833	0.04488	Mycena	70.5366	0.05144
Tricholoma	79.9992	0.06892	Micromphale	102.95	0.04203	Unknown	56.5507	0.06414
Russula	190.288	0.02887	Armillaria	71.2521	0.06061	Unknown	58.3491	0.06171
Pleurotus	74.7876	0.07188	Psathyrella	75.2388	0.05692	Ramaria	123.916	0.02896
Psathyrella	75.881	0.07078	Unknown	67.0595	0.06278	Armillaria	61.3325	0.0582
Hypholoma	116.669	0.04563	Russula	216.535	0.01938	Naematoloma	116.101	0.0307
Tricholoma	128.354	0.04093	Unknown	124.671	0.0336	Crepidotus	160.573	0.02206
Coprinus	161.887	0.03238	Unknown	72.7753	0.05716	Oudemansiella	206.186	0.01712
Armillaria	74.2311	0.07026	Unknown	145.428	0.02846	Armillaria	54.6772	0.06451
Gymnopilus	66.1746	0.07718	Pleurotus	65.9073	0.06264	Armillaria	58.4504	0.05983
Epithele	201.672	0.0325	Agaricus	54.5846	0.07554	Omphalina	90.7298	0.0383
Rhodocollybia	114.69	0.0438	Coprinus	0	-0.09768	Unknown	104.334	0.03326
Leucocoprinus	83.4559	0.05978	Pholiota	81.0666	0.05084	Schizophyllum	51.7282	0.06677
Psathyrella	110.892	0.04479	Unknown	107.38	0.03799	Xeromphalina	80.909	0.04246
Panellus	88.7941	0.05547	Pleurotus	80.2094	0.05075	Armillaria	46.5111	0.07367
Panellus	117.053	0.04171	Psathyrella	86.5925	0.04677	Favolaschia	101.648	0.03358
Marasmius	109.221	0.0446	Marasmiellus	91.8545	0.04405	Gymnopus	103.062	0.03292
Dacrymycetes	51.5493	0.09268	Xeromphalina	48.848	0.08188	Filoboletus	62.0445	0.05461
Gloiocephala	108.483	0.04381	Hypholoma	135.375	0.02942	Lyophyllum	74.2558	0.04557
Species	TFagar	Dry weight (g)	Species	TFagar	Dry weight (g)	Species	TFagar	Dry weight (g)
Phaeolepiota	66.6681	0.07037	Cyphella	75.0832	0.05299	Gymnopus	285.485	0.01177
Hypholoma	113.856	0.02944	Armillaria	66.3934	0.04338	Hericium	100.404	0.02487
Armillaria	53.0773	0.06301	Unknown	65.5149	0.0439	Pholiota	35.8094	0.06959
Gymnopilus	82.2307	0.04064	Hypsizygus	125.506	0.02287	Oudemansiella	88.6592	0.028
Schizophyllum	40.0697	0.0826	Hypholoma	102.449	0.02765	Unknown	62.1214	0.03992
Unknown	97.0323	0.03381	Coprinus	97.506	0.02895	Lyophyllum	23.7489	0.10428
Respinatus	96.2307	0.03404	Pleurotus	120.637	0.02337	Hypholoma	94.3059	0.02622
Coprinus	67.8047	0.04798	Panus	73.6856	0.03816	Phyllotopsis	106.846	0.02306
Pleurotus	77.1832	0.0421	Campanella	57.0856	0.04909	Chlorophyllum	109.069	0.0225
Hypholoma	118.118	0.02748	Lyophyllum	26.8723	0.10415	Tremella	59.0795	0.04137
Unknown	131.796	0.02434	Unknown	93.9411	0.02967	Oudemansiella	65.2822	0.03677
Armillaria	49.1254	0.06439	Unknown	110.111	0.02527	Hohenbuehelia	51.2187	0.04672
Tremella	62.499	0.05045	Pluteus	59.231	0.04692	Pleurotus	35.6096	0.0671
Omphalotus	77.3289	0.04026	Phallus	74.5518	0.03723	Gymnopus	176.702	0.0135
Unknown	79.4447	0.0391	Armillaria	48.549	0.05634	Hypholoma	111.847	0.0213
Armillaria	117.817	0.02635	Lyophyllum	43.6902	0.06234	Crepidotus	64.0199	0.0371
Armillaria	67.1485	0.04605	Unknown	92.676	0.02938	Unknown	143.369	0.01651
Pleurotus	61.9379	0.04955	Pleurotus	76.2129	0.03572	Unknown	67.0316	0.03517
Geastrum	48.8376	0.0626	Dictyopanus	106.036	0.0256	Hohenbuehelia	56.4048	0.0415
Oudemansiella	79.6998	0.03835	Hypholoma	94.0563	0.02874	Omphalotus	68.5425	0.03391
Marasmius	95.0139	0.03193	Unknown	81.9751	0.03271	Hohenbuehelia	27.3097	0.08497
Pholiota	97.6517	0.03102	Omphalotus	78.3061	0.03421	Pleurotus	51.3899	0.0451
Collybia	62.6022	0.0483	Lentinus	52.9272	0.05038	Clitocybe	56.8745	0.04071
Panellus	67.7923	0.04451	Armillaria	70.0787	0.03794	Unknown	125.675	0.0184
Mycoleptodonoides	104.578	0.02869	Unknown	43.3136	0.06132	Unknown	87.898	0.0262
Marasmius	67.7633	0.04406	Marasmius	125.561	0.02113	Pholiota	41.7618	0.05511
Unknown	71.1755	0.04189	Armillaria	95.4865	0.02774	Chaetocalathus	50.2942	0.04552
Filoboletus	39.2955	0.07584	Unknown	49.4872	0.05317	Omphalotus	79.0791	0.02892
Schizophyllum	58.5369	0.05073	Mycoleptodonoides	108.931	0.02403	Dictyopanus	58.4524	0.0391
Unknown	58.8837	0.0501	Polyporus	74.5104	0.03484	Hohenbuehelia	47.7706	0.04778
Mycena	110.964	0.02655	Phyllotopsis	87.3219	0.02967	Daedalea	76.4426	0.02974
Auricularia	92.3482	0.03176	Armillaria	65.0871	0.03971	Lyophyllum	31.3825	0.07243
Oudemansiella	47.0341	0.06234	Ossicaulis	94.0789	0.02699	Lentinus	97.1281	0.02339
Dictyopanus	59.2436	0.04937	Auricularia	96.9593	0.02617	Psathyrella	61.4913	0.03694
Hypholoma	101.728	0.02875	Phellinus	61.7579	0.04094	Unknown	69.3252	0.03267
Marasmius	54.2242	0.05369	Crepidotus	45.6596	0.05491	Schizophyllum	85.9533	0.02559
Species	TFagar	Dry weight (g)	Species	TFagar	Dry weight (g)	Species	TFagar	Dry weight (g)
Mycena	81.988	0.0355	Pulveroboletus	80.3166	0.03118	Unknown	128.642	0.01704
Naematoloma	59.1796	0.03688	Tremella	39.3913	0.05139	Mycena	142.141	0.01283
Microporus	87.2793	0.025	Panellus	70.9121	0.02847	Paxillus	32.8753	0.05533
Marasmiuellus	44.3802	0.04915	Marasmiellus	77.0406	0.02608	Pholiota	35.9194	0.05048
Armillaria	50.977	0.04276	Gymnopus	49.5294	0.04053	Cyphella	55.7028	0.03243
Unknown	108.892	0.02001	Marasmius	51.1521	0.03906	Mycena	53.8333	0.03326
Gumnopilus	59.3889	0.03665	Marasmiaceae	60.5505	0.0445	Schizophyllum	71.8927	0.02483
Flammulina	115.54	0.01877	Omphalotus	50.1809	0.03929	Dictyopanus	62.2447	0.02867
Unknown	75.7035	0.02851	Mycoleptodonoides	98.605	0.01987	Hypholoma	73.2298	0.02426
Panellus	83.3805	0.02587	Mycena	70.8043	0.02754	Gymnopus	61.4149	0.02873
Hypholoma	85.3141	0.02517	Hypholoma	65.1746	0.02983	Crinipellis	37.743	0.04657
Omphalotus	75.2268	0.02846	Hypholoma	60.1174	0.03227	Lactocollybia	53.7473	0.03256
Omphalotus	74.7719	0.02856	Lyophyllum	33.6163	0.0577	Strobilurus	27.8624	0.06269
Micromphale	76.1042	0.02797	Phyllotopsis	94.6937	0.02047	Marasmius	36.4307	0.04783
Pleurotus	74.6635	0.02849	Anellaria?	30.75	0.06298	Panellus	47.7485	0.03641
Marasmiellus	60.0711	0.03539	Collybia	97.8389	0.01954	Lentinus	93.3074	0.01858
Mycena	54.4939	0.03901	Marasmius	78.3114	0.02439	Gloiocephala	18.2171	0.09515
Omphalotus	51.2474	0.04127	Polyporus	49.4958	0.03856	Marasmius	45.3608	0.03804
Dictyopanus	41.9018	0.05047	Panus	68.0769	0.02803	Unknown	29.9723	0.05731
Tricholoma	46.9857	0.04493	Xerula	75.9855	0.02504	Unknown	46.0931	0.03726
Psathyrella	82.3942	0.02558	Hohenbuehelia	30.4193	0.06188	Pleurotus	67.9909	0.0252
Mycena	46.793	0.045	Roseofomes	43.278	0.04337	Pholiota	77.1084	0.02216
Tremella	38.8924	0.05411	Psatyrella	52.351	0.03585	Collybia?	22.4206	0.07603
Unknown	55.5548	0.03783	Hohenbuehelia	52.271	0.03579	Unknown	94.1355	0.01809
Marasmius	50.3925	0.04167	Lepiota	29.0367	0.06428	Unknown	54.079	0.03143
Crepidotus	44.5165	0.04679	Mar	56.6434	0.0327	Marasmius	41.6647	0.04074
Termitomyces	36.9249	0.05638	Agaricus	98.4293	0.01877	Hypholoma	91.8356	0.01848
Suillus	103.333	0.02014	Hohenbuehelia	40.3601	0.04576	Unknown	46.8036	0.0362
Pholiota	107.687	0.01929	Strobilurus	77.2615	0.02389	Mycena	49.969	0.03389
Psathyrella	53.3703	0.03881	Hohenbuehelia	49.5376	0.03717	Lyophyllum	25.3486	0.06663
Unknown	87.8395	0.02356	Dictyopanus	42.6118	0.04321	Unknown	32.9959	0.0511
Marasmius	75.8444	0.02711	Marasmius	100.679	0.01822	Pleurotus	57.4234	0.02928
Pleurotus	61.474	0.03318	Hypholoma	72.241	0.02536	Unknown	38.8332	0.04328
Schizophyllum	72.913	0.02794	Gymnopus	79.2995	0.0231	Oudemansiella	79.6111	0.02111
Pholiota	65.7424	0.03097	Filoboletus	49.8313	0.03673	Lepista	49.3649	0.03404
Species	TFagar	Dry weight (g)	Species	TFagar	Dry weight (g)	Species	TFagar	Dry weight (g)
Schizophyllum	35.1467	0.05773	Pholiota	77.9955	0.02346	Hypholoma	64.1773	0.02618
Psathyrella	66.5502	0.03047	Naematoloma	115.214	0.01588	Marasmius	37.3369	0.04453
Mycena	39.9032	0.04154	Auricularia	52.3821	0.02799	Kuehneromyces	112.078	0.01165
Pholiota	66.8226	0.02478	Gloiocephala	34.4821	0.04239	Xeromphalina	48.6327	0.02684
Pholiota	85.5052	0.01936	Unknown	67.5004	0.02159	Armillaria	25.9158	0.05034
Schizophyllum	41.3024	0.03994	Auricularia	72.4705	0.02009	Marasmius	93.54	0.01394
Lyophyllum	30.7983	0.05341	Schizophyllum	21.2002	0.06813	Xeromphalina	70.4433	0.01851
Dacryomyces	39.499	0.04147	Neolentinus	56.6042	0.02546	Lentinus	56.6835	0.02283
Guepinia	42.3966	0.03861	Xeromphalina	49.0049	0.02939	Pholiota	84.1003	0.01534
Schizophyllum	23.4974	0.06935	Oudemansiella	82.5605	0.01743	Trametes	66.501	0.01927
Schizophyllum	27.5057	0.05922	Unknown	70.5128	0.02034	Guepinia	36.6813	0.0349
Xeromphalina	49.3976	0.03293	Marasmiellus	25.0936	0.05687	Hypholoma	100.157	0.01273
Gloiocephala	62.1434	0.02604	Mycoleptodonoides	73.0837	0.01951	Ossicaulis	77.8623	0.01632
Polyporus	95.9696	0.01682	Unknown	35.5965	0.04005	Collybia	75.2202	0.01682
Mycena	100.194	0.0161	Unknown	71.2677	0.01985	Flammulina	54.6029	0.02317
Mycoleptodonoides	74.9244	0.02143	Pholiota	239.721	0.00587	Neonothopanus	34.2472	0.03686
Armillaria	35.8073	0.04469	Marasmiellus	175.582	0.00797	Lyophyllum	28.9019	0.04361
Hohenbuehelia	23.2895	0.0684	Hypholoma	37.1445	0.03765	Lentinus	74.0676	0.01699
Dictyopanus	62.694	0.02535	Oudemansiella	59.4388	0.02343	Neolentinus	48.1217	0.02615
Unknown	46.1686	0.03436	Neolentinus	60.5106	0.02295	Panellus	40.2678	0.03124
Armillaria	40.4476	0.03867	Unknown	52.3124	0.02647	Panellus	68.2066	0.0183
Polyporus	49.9541	0.03125	Unknown	97.2248	0.01421	Omphalotus	45.3013	0.02755
Hypholoma	61.7126	0.02528	Inonotus	76.6464	0.018	Omphalotus	48.693	0.02554
Unknown	53.2648	0.02917	Coprinus	30.3741	0.0452	Marasmius	41.1051	0.03013
Pleurotus	50.569	0.03039	Unknown	46.2296	0.02967	Ganoderma	69.6434	0.01765
Filoboletus	82.6639	0.01859	Hypholoma	63.7064	0.0215	Unknown	72.8094	0.01685
Scleroderma	65.7337	0.02324	Pleurocybella	48.5642	0.02815	Unknown	170.862	0.00716
Unknown	64.3486	0.02374	Laetiporus	60.2714	0.02257	Flammulina	42.8367	0.02852
Guepinia	33.9128	0.04498	Panellus	35.9276	0.03768	Pleurotus	43.8875	0.02751
Crepidotus	24.2084	0.06265	Mycoleptodonoides	79.0308	0.01701	Unknown	27.5193	0.04384
Mycena	52.8443	0.02862	Armillaria	41.0421	0.03269	Clitocybella	56.1499	0.02147
Unknown	57.5513	0.02626	Pleurotus	44.9719	0.02976	Agrocybe	56.8849	0.02105
Panellus	53.2222	0.02835	Omphalina	33.3814	0.0398	Collybia	50.3032	0.02378
Auricularia	40.7741	0.03686	Unknown	17.5878	0.07554	Cyptotrama	46.9133	0.02534
Omphalotus	61.8862	0.02415	Entoloma	74.8243	0.01768	Pleurotus	55.1522	0.02151
Species	TFagar	Dry weight (g)	Species	TFagar	Dry weight (g)	Species	TFagar	Dry weight (g)
Marasmius	42.6958	0.03449	Dictyopanus	37.9603	0.03482	Mycoleptodonoides	43.0678	0.02747
Crepidotus	70.6541	0.02079	Unknown	55.8857	0.02359	Unknown	42.2432	0.02788
Unknown	55.6774	0.02636	Lentinellus	59.9835	0.02196	Filoboletus	40.5392	0.02895
Marasmius	64.8936	0.01803	Xeromphalina	33.1117	0.03057	Pleurotus	53.3586	0.01693
Pleurotus	42.3526	0.02747	Xeromphalina	32.1664	0.03145	Auricularia	68.5627	0.01317
Unknown	89.8859	0.01289	Pleurotus	42.9035	0.02355	Respinatus?	35.3648	0.02553
Neolentinus	46.5425	0.02486	Unknown	28.8366	0.03489	Collybia	178.901	0.00504
Fuscoporia	56.5804	0.02036	Lentinus	38.2884	0.02627	Polyporus	45.6136	0.01974
Unknown	44.9087	0.02552	Schizophyllum	43.7735	0.02275	Favolaschia	48.5759	0.01849
Unknown	41.7859	0.02733	Pleurocybella	20.2454	0.04917	Lentinus	84.7674	0.01058
Omphalotus	41.1325	0.02756	Lepista	27.332	0.0364	Pleurotus	89.5781	0.00998
Xeromphalina	40.2778	0.02813	Gymnopilus	48.8391	0.02031	Trogia	64.7799	0.01377
Marasmiellus	45.9252	0.02466	Hohenbuehelia	71.3396	0.0139	Dictyopanus	42.166	0.02092
Naematoloma	54.0123	0.02095	Marasmius	42.3432	0.02317	Flammunilna	37.5962	0.02345
Mycena	28.3382	0.03981	Collybia	38.6681	0.02534	Xeromphalina	73.1448	0.01205
Unknown	45.1048	0.02495	Oudemansiella	68.7253	0.01423	Oudemansiella	69.1357	0.01269
Lentinus	49.2516	0.02269	Oudemansiella	48.1345	0.02024	Unknown	75.5738	0.01156
Unknown	73.0606	0.01529	Lepiota	112.357	0.00859	Lentinus	92.777	0.00939
Pleurotus	66.2463	0.01674	Panellus	57.4237	0.01673	Pleurotus	60.493	0.01422
Strobilurus	28.1956	0.03927	Panellus	40.5508	0.0236	Pholiota	65.2469	0.01318
Flammulina	49.3463	0.02231	Unknown	50.3313	0.01895	Omphalina	41.6114	0.02041
Xeromphalina	70.7017	0.0155	Dictyopanus	35.127	0.02711	Pholiota	80.3702	0.01055
Micromphale	61.9084	0.0177	Pholiota	60.2185	0.0158	Auricularia	59.9367	0.01408
Pleurotus	36.4307	0.03004	Xeromphalina	31.7297	0.02976	Mycoleptodonoides	59.9042	0.01406
Marasmius	62.4462	0.01734	Schizophyllum	29.6743	0.03158	Collybia	79.3681	0.01057
Lentinus	59.1811	0.01823	Marasmiellus	25.8123	0.0363	Unknown	53.146	0.01571
Unknown	55.0927	0.01947	Unknown	25.8478	0.03617	Pholiota	41.0843	0.02032
Lyophyllum	25.1275	0.0426	Oudemansiella	257.52	0.00363	Xeromphalina	42.9184	0.01936
Pholiota	57.0144	0.01867	Agrocybe	24.1706	0.03854	Fistulina	92.8836	0.00893
Phyllotopsis	30.7316	0.0345	Armillaria	56.8819	0.0162	Polyporus	53.4506	0.01548
Marasmiellus	109.637	0.00965	Xeromphalina	47.6207	0.01926	Lactocollybia?	32.2679	0.0256
Xeromphalina	32.401	0.03223	Hohenbuehelia	23.26	0.03943	Pleurotus	52.0404	0.01579
Pycnoporus	39.2385	0.02634	Anthracophyllum	37.9834	0.02409	Pleurotus	32.5551	0.02509
Armillaria	58.6645	0.0176	Calocybe	20.9513	0.04365	Pleurotus	39.5999	0.02062
Crepidotus	30.9595	0.03324	Pycnoporus	24.7066	0.03689	Schizophyllum	35.3393	0.0231
Species	TFagar	Dry weight (g)	Species	TFagar	Dry weight (g)	Species	TFagar	Dry weight (g)
Unknown	70.2766	0.01457	Marasmius	53.9116	0.01689	Xerula	40.3945	0.02016
Auricularia	16.322	0.0626	Dictyopanus	29.6816	0.03066	Pholiota	62.5537	0.01298
Pholiota	54.6098	0.01867	Pholiota	36.4322	0.02489	Lenzites	64.9765	0.01247
Pleurotus	69.508	0.01462	Suillus	14.5452	0.06234	Mycena	27.5734	0.02921
Psathyrella	53.5328	0.01496	Unknown	54.8675	0.01283	Marasmiellus	78.0055	0.00793
Unknown	46.9116	0.017	Coprinius	38.5856	0.01824	Omphalotus	59.3486	0.01041
Fistulina	104.161	0.00765	Polyporus	69.4153	0.01011	Hypholoma	22.0177	0.02803
Auricularia	38.9346	0.02039	Marasmiellus	35.5197	0.0197	Agaricus	41.5206	0.01483
Hericium	77.6659	0.0102	Unknown	45.4157	0.01539	Auricularia	130.752	0.00466
Cyptotrama	45.3004	0.01747	Unknown	42.404	0.0164	Marasmius	40.9401	0.01484
Hypsizygus	71.6878	0.01103	Mycena	12.0445	0.05746	Micromphale	43.0126	0.01406
Pycnoporus	55.3772	0.01426	Fomitella	64.802	0.01067	Unknown	33.272	0.01816
Pleurotus	58.0575	0.01359	Mycena	23.1703	0.02954	Gloiocephala?	53.0141	0.01137
Coprinus	49.1008	0.01604	Xeromphalina	27.009	0.02534	Chaetocalathus	30.7563	0.01958
Panellus	56.2558	0.01396	Pholiota	43.7291	0.01564	Pleurotus	39.3449	0.0153
Lycoperdon	29.0824	0.02699	Neolentinus	34.0515	0.02	Pholiota	62.9004	0.00952
Marasmiellus	42.8169	0.01821	Crepidotus	32.6997	0.02069	Oudemansiella	77.3898	0.00773
Calvatia	52.4576	0.01485	Mycena	38.5135	0.0175	Micromphale	54.2316	0.01088
Lentinus	73.216	0.01063	Coriolus	86.7825	0.00775	Panellus	81.991	0.00719
Hypholoma	45.7807	0.01697	Xerula	99.133	0.00677	Pholiota	45.2904	0.01293
Kuehneromyces	46.544	0.01669	Panellus	87.4045	0.00767	Xeromphalina	32.6596	0.01787
Amanita	33.6127	0.02285	Crepidotus	54.7887	0.01221	Schizophyllum	33.4965	0.0173
Panellus	68.4099	0.01121	Filoboletus	32.4042	0.02061	Clavicorona	24.0156	0.02406
Pleurotus	68.626	0.01115	Micromphale	70.9056	0.0094	Psathyrella	34.3061	0.01681
Unknown	130.654	0.00577	Lepiota	86.3335	0.00766	Unknown	57.8888	0.00996
Phellinus	50.9009	0.01477	Panellus	53.2405	0.01237	Resupinatus	88.2645	0.00653
Psathyrella	44.987	0.01667	Pholiota	86.0628	0.00763	Lentinus	63.0884	0.00909
Mycena	25.1045	0.02958	Pholiota	59.8943	0.01092	Lentinus	49.8083	0.01151
Pleurotus	39.3629	0.01885	Collybia	64.4012	0.01015	Psatyrella	256.483	0.00223
Marasmius	62.6305	0.01183	Marasmiellus	33.6208	0.01943	Hypholoma	39.8014	0.01435
Psathyrella	29.3829	0.02496	Kuehneromyces	63.2274	0.01032	Unknown	18.3053	0.03119
Hypholoma	47.9316	0.01527	Lentinus	114.788	0.00565	Marasmiellus	52.86	0.01079
Stropharia	43.5655	0.0168	Pholiota	71.3153	0.00908	Auricularia	112.558	0.00506
Trogia	41.0302	0.01783	Marasmius	111.168	0.00569	Marasmius	80.038	0.00709
Marasmiellus	73.5168	0.00995	Hypsizygus	149.229	0.00421	Hohenbuehelia	55.0223	0.01016
Species	TFagar	Dry weight (g)	Species	TFagar	Dry weight (g)	Species	TFagar	Dry weight (g)
Marasmius	35.223	0.01571	Anelaria	33.0478	0.01349	Oudemansiella	35.9554	0.02024
Xeromphalina	61.2027	0.00903	Micromphale	40.7163	0.01083	Coriolus	53.8943	0.01349
Pleurotus	44.1001	0.01253	Marasmius	31.9061	0.01369	Xeromphalina	56.6128	0.01283
Crepidotus	52.0218	0.01057	Lentinus	39.3745	0.01094	Omphalotus	61.4927	0.0118
Unknown	29.0025	0.01889	Marasmiellus	42.1212	0.01022	Polyporus	38.9848	0.01809
Hypsizygus	127.581	0.00428	Laetiporus	68.6458	0.00625	Marasmius	60.8783	0.01029
Filoboletus	48.4513	0.01118	Marasmius	24.1344	0.01775	Xeromphalina	27.6017	0.02268
Fomitopsis	123.984	0.00436	Laetiporus	97.8895	0.00433	Auricularia	37.5723	0.01653
Pholiota	42.0721	0.01272	Marasmiellus	212.904	0.00199	Neolentinus	28.3119	0.02188
Polyporus	26.0185	0.02056	Pleurotus	216.547	0.00193	Pholiota	41.798	0.0148
Ganoderma	128.256	0.00411	Unknown	12.9777	0.03213	Marasmius	42.7241	0.01304
Micromphale	24.8	0.02107	Laetiporus	37.6289	0.0106	Unknown	27.4567	0.02029
Hypholoma	61.6094	0.00847	Marasmius	49.71	0.00766	Auricularia	44.0338	0.01261
Pleurotus	39.8206	0.01309	Leucoagaricus	105.908	0.00352	Collyiba	43.3775	0.0128
Scleroderma	39.7739	0.0131	Laetiporus	104.012	0.00333	Polyporus	146.406	0.00378
Fistulina	51.0629	0.01019	Unknown	8.81997	0.03925	Mycena	48.0534	0.00997
Neolentinus	49.9325	0.01033	Unknown	18.981	0.0174	Unknown	341.503	0.00139
Micromphale	50.2429	0.01004	Xeromphalina	35.4376	0.00484	Lentinus	63.6827	0.00734
Crepidotus	117.846	0.00426	Clitocybe	11.6443	0.01337	Neolentinus	79.2649	0.00587
Hohenbuehelia	30.3328	0.01648	Agaricus	252.897	0.00058	Lentinula	47.8046	0.00967
Laetiporus	42.804	0.01164	Gymnopilus	43.1628	0.01126	Lentinula	55.7904	0.00815
Gymnopus	62.2762	0.008	Unknown	150.526	0.0032	Marasmius	78.9234	0.0057
Unknown	91.7437	0.00539	Lentinus	83.5684	0.00576	Marasmius	27.2922	0.01637
Lentinula	53.5484	0.00896	Mycena	61.004	0.00788
