# Supplementary material for: Role of filamentous fungi in migration of radioactive cesium in the Fukushima forest soil environment
Source: Royal Society of Chemistry journal article supplement (doi:10.1039/c9em00046a), 2019-01-01
Supplement: c9em00046a2.pdf [file c9em00046a2.pdf]

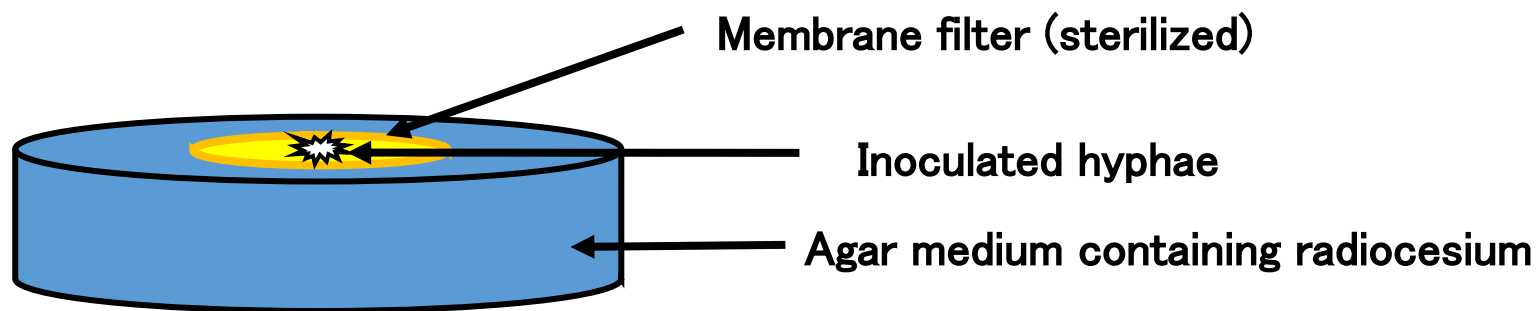

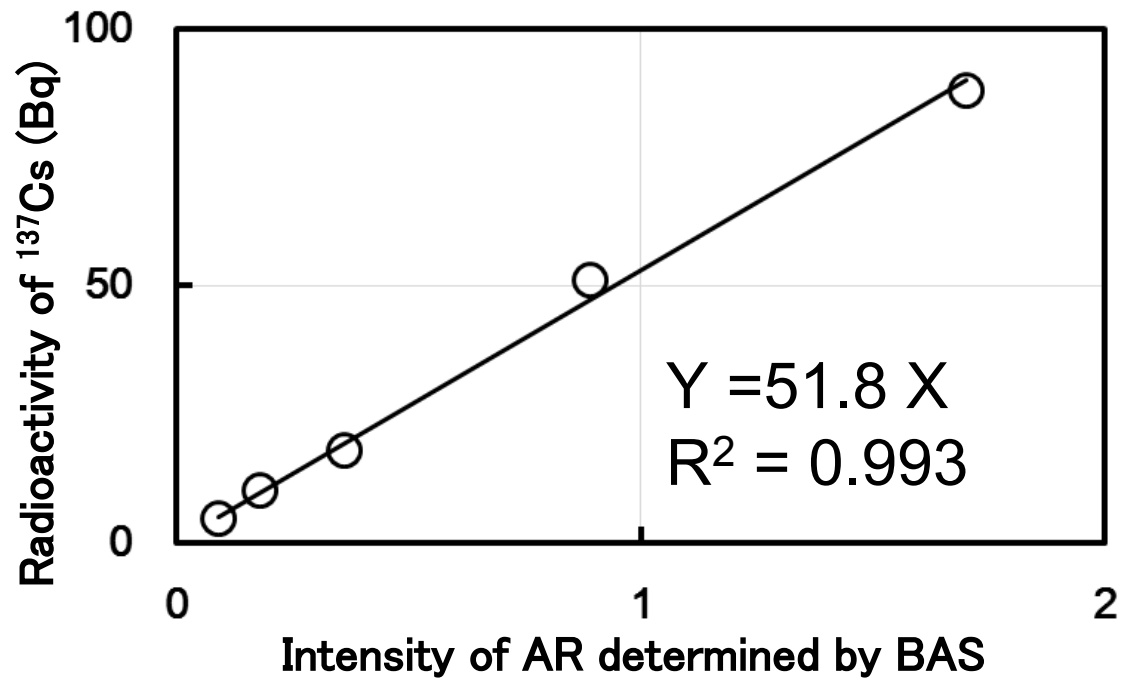

Supplementary Fig. 2

| <b>Photo</b>                                                                       | <b>Photo</b>                                                                         |
|------------------------------------------------------------------------------------|--------------------------------------------------------------------------------------|
| 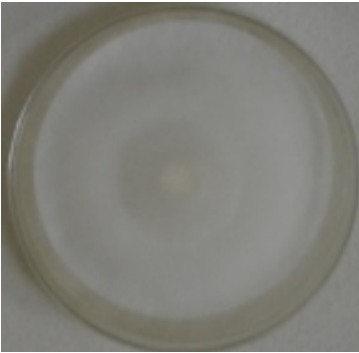  |    |
| <b>With <math>^{137}\text{Cs}</math></b>                                           | <b>Control without <math>^{137}\text{Cs}</math></b>                                  |
|  |  |

Supplementary Fig. 3
