# Supplementary material for: Role of filamentous fungi in migration of radioactive cesium in the Fukushima forest soil environment
Source: Royal Society of Chemistry journal article supplement (doi:10.1039/c9em00046a), 2019-01-01
Supplement: c9em00046a4.pdf [file c9em00046a4.pdf]

Supplementary Table 1

| Mushroom                       |                | □      | Activity (Bq/kg)  |                   | TF                   |
|--------------------------------|----------------|--------|-------------------|-------------------|----------------------|
| Species                        | Dry weight (g) | □      | Mushroom          | Soil              | □                    |
| <i>Antrodia sp.</i>            | 0.71           | Cs-137 | $3.4 \times 10^5$ | $1.4 \times 10^5$ | 2.4                  |
| <i>Boletaceae sp.</i>          | 1.98           | Cs-137 | $1.6 \times 10^6$ | $5.3 \times 10^4$ | 31                   |
| <i>Cortinarius violaceus</i>   | 0.25           | Cs-137 | $5.8 \times 10^5$ | $9.3 \times 10^4$ | 6.2                  |
| <i>Entoloma sarcopum</i>       | 3.31           | Cs-137 | $1.6 \times 10^4$ | $1.8 \times 10^5$ | $9.0 \times 10^{-2}$ |
| <i>Entoloma sarcopum</i>       | 1.98           | Cs-137 | $8.3 \times 10^4$ | $8.5 \times 10^4$ | $9.7 \times 10^{-1}$ |
| <i>Entoloma sp.</i>            | 1.38           | Cs-137 | $1.8 \times 10^4$ | $6.1 \times 10^5$ | $2.9 \times 10^{-2}$ |
| <i>Gomphus floccosus</i>       | 0.45           | Cs-137 | $6.2 \times 10^4$ | $1.3 \times 10^5$ | $4.7 \times 10^{-1}$ |
| <i>Hydnum sp.</i>              | 0.53           | Cs-137 | $2.2 \times 10^4$ | $4.3 \times 10^4$ | $5.1 \times 10^{-1}$ |
| <i>Hydnum sp.</i>              | 1.19           | Cs-137 | $3.8 \times 10^4$ | $1.4 \times 10^5$ | $2.7 \times 10^{-1}$ |
| <i>Hydnum sp.</i>              | 1.14           | Cs-137 | $2.2 \times 10^4$ | $5.0 \times 10^4$ | $4.4 \times 10^{-1}$ |
| <i>Hygrocybe psittacina</i>    | 0.17           | Cs-137 | $1.2 \times 10^7$ | $3.3 \times 10^5$ | 37                   |
| <i>Hygrocybe psittacina</i>    | 4.37           | Cs-137 | $7.3 \times 10^4$ | $1.0 \times 10^5$ | $7.1 \times 10^{-1}$ |
| <i>Hygrocybe psittacina</i>    | 2.04           | Cs-137 | $1.1 \times 10^5$ | $9.3 \times 10^4$ | 1.1                  |
| <i>Hygrocybe psittacina</i>    | 0.64           | Cs-137 | $6.9 \times 10^4$ | $1.2 \times 10^5$ | $6.0 \times 10^{-1}$ |
| <i>Hygrocybe psittacina</i>    | 0.83           | Cs-137 | $8.4 \times 10^4$ | $1.9 \times 10^5$ | $4.4 \times 10^{-1}$ |
| <i>Hypholoma sublateritium</i> | 5.85           | Cs-137 | $5.2 \times 10^4$ | $3.6 \times 10^4$ | 1.4                  |
| <i>Lactarius chrysorrheus</i>  | 0.26           | Cs-137 | $1.6 \times 10^6$ | $9.3 \times 10^4$ | 17                   |

|                                  |      |        |                   |                   |                      |
|----------------------------------|------|--------|-------------------|-------------------|----------------------|
| <i>Lactarius laeticolor</i>      | 3.5  | Cs-137 | $1.2 \times 10^5$ | $2.1 \times 10^5$ | $5.8 \times 10^{-1}$ |
| <i>Lactarius laeticolor</i>      | 7.29 | Cs-137 | $3.2 \times 10^4$ | $9.1 \times 10^4$ | $3.5 \times 10^{-1}$ |
| <i>Lactarius laeticolor</i>      | 1.13 | Cs-137 | $8.3 \times 10^4$ | $6.9 \times 10^4$ | 1.2                  |
| <i>Lactarius laeticolor</i>      | 1.23 | Cs-137 | $5.4 \times 10^4$ | $7.7 \times 10^4$ | $7.1 \times 10^{-1}$ |
| <i>Lactarius sp.</i>             | 1.29 | Cs-137 | $8.2 \times 10^4$ | $1.4 \times 10^5$ | $5.9 \times 10^{-1}$ |
| <i>Lycoperdon perlatum Pers.</i> | 1.63 | Cs-137 | $2.6 \times 10^4$ | $4.5 \times 10^4$ | $5.6 \times 10^{-1}$ |
| <i>Lycoperdon perlatum Pers.</i> | 0.49 | Cs-137 | $1.3 \times 10^4$ | $1.2 \times 10^5$ | $1.1 \times 10^{-1}$ |
| <i>Lyophyllum sp.</i>            | 7.75 | Cs-137 | $8.5 \times 10^3$ | $4.0 \times 10^4$ | $2.1 \times 10^{-1}$ |
| <i>Lyophyllum sp.</i>            | 0.86 | Cs-137 | $4.0 \times 10^4$ | $6.8 \times 10^4$ | $5.9 \times 10^{-1}$ |
| <i>Lyophyllum sp.</i>            | 0.45 | Cs-137 | $2.0 \times 10^4$ | $4.2 \times 10^4$ | $4.7 \times 10^{-1}$ |
| <i>Lyophyllum sp.</i>            | 4.23 | Cs-137 | $5.4 \times 10^4$ | $1.3 \times 10^5$ | $4.3 \times 10^{-1}$ |
| <i>Lyophyllum sp.</i>            | 1.08 | Cs-137 | $4.8 \times 10^4$ | $6.8 \times 10^4$ | $7.1 \times 10^{-1}$ |
| <i>Mycena sp.</i>                | 0.26 | Cs-137 | $1.3 \times 10^6$ | $7.9 \times 10^4$ | 16                   |
| <i>Mycena sp.</i>                | 0.18 | Cs-137 | $1.1 \times 10^6$ | $7.4 \times 10^4$ | 14                   |
| <i>Russula delica</i>            | 0.27 | Cs-137 | $2.5 \times 10^6$ | $2.2 \times 10^4$ | $1.1 \times 10^2$    |
| <i>Russula sp.</i>               | 0.25 | Cs-137 | $6.3 \times 10^5$ | $3.7 \times 10^4$ | 17                   |
| <i>Russulaceae sp</i>            | 2.48 | Cs-137 | $5.4 \times 10^4$ | $3.6 \times 10^4$ | 1.5                  |
| <i>Russulaceae sp.</i>           | 0.55 | Cs-137 | $1.6 \times 10^7$ | $1.7 \times 10^5$ | 92                   |

|                                                  |      |        |                   |                   |                      |
|--------------------------------------------------|------|--------|-------------------|-------------------|----------------------|
| <b><i>Russulaceae</i> sp.</b>                    | 0.62 | Cs-137 | $9.9 \times 10^4$ | $3.2 \times 10^5$ | $3.0 \times 10^{-1}$ |
| <b><i>Russulaceae</i> sp.</b>                    | 0.46 | Cs-137 | $7.3 \times 10^5$ | $1.0 \times 10^5$ | 7.2                  |
| <b><i>Suillus</i> sp.</b>                        | 1.11 | Cs-137 | $2.2 \times 10^5$ | $6.7 \times 10^4$ | 3.3                  |
| <b><i>Tyromyces chioneus</i> (Fr.) P. Karst.</b> | 0.27 | Cs-137 | $1.8 \times 10^5$ | $6.5 \times 10^3$ | 27                   |
