# Supplementary material for: Role of filamentous fungi in migration of radioactive cesium in the Fukushima forest soil environment
Source: Royal Society of Chemistry journal article supplement (doi:10.1039/c9em00046a), 2019-01-01
Supplement: c9em00046a5.pdf [file c9em00046a5.pdf]

Supplementary Table 2

| Species              | TF <sub>agar</sub> | Dry weight (g) | Species              | TF <sub>agar</sub> | Dry weight (g) | Species                 | TF <sub>agar</sub> | Dry weight (g) |
|----------------------|--------------------|----------------|----------------------|--------------------|----------------|-------------------------|--------------------|----------------|
| <i>Hypholoma</i>     | 4.69E+02           | 3.34E-02       | <i>Gloiocephala</i>  | 8.55E+01           | 5.45E-02       | <i>Armillaria</i>       | 5.90E+01           | 6.69E-02       |
| <i>Phallus</i>       | 1.13E+02           | 7.16E-02       | <i>Rhizopogon</i>    | 1.78E+02           | 2.60E-02       | <i>Pseudomerulius</i>   | 1.22E+02           | 3.21E-02       |
| <i>Marasmiellus</i>  | 2.48E+02           | 3.23E-02       | <i>Dictyopanus</i>   | 6.91E+01           | 6.68E-02       | <i>Panus</i>            | 1.27E+02           | 3.07E-02       |
| <i>Leucocoprinus</i> | 1.88E+02           | 3.77E-02       | <i>Agaricus</i>      | 1.38E+02           | 3.34E-02       | <i>Suillus</i>          | 5.42E+01           | 7.15E-02       |
| <i>Unknown</i>       | 7.03E+01           | 9.99E-02       | <i>Unknown</i>       | 1.29E+02           | 3.58E-02       | <i>Unknown</i>          | 7.62E+01           | 5.07E-02       |
| <i>Lentinula</i>     | 1.55E+02           | 4.35E-02       | <i>Marasmius</i>     | 1.17E+02           | 3.92E-02       | <i>Unknown</i>          | 6.91E+01           | 5.58E-02       |
| <i>Agaricus</i>      | 1.39E+02           | 4.78E-02       | <i>Unknown</i>       | 7.50E+01           | 6.06E-02       | <i>Suillus</i>          | 7.87E+01           | 4.89E-02       |
| <i>Mar</i>           | 6.08E+01           | 1.09E-01       | <i>Psathyrella</i>   | 8.85E+01           | 5.13E-02       | <i>Xeromphalina</i>     | 1.19E+02           | 3.22E-02       |
| <i>Crepidotus</i>    | 1.03E+02           | 6.07E-02       | <i>Lepiota</i>       | 1.02E+02           | 4.44E-02       | <i>Marasmiellus</i>     | 9.98E+01           | 3.84E-02       |
| <i>Lactocollybia</i> | 2.11E+02           | 2.89E-02       | <i>Suillus</i>       | 8.06E+01           | 5.61E-02       | <i>Panellus</i>         | 1.72E+02           | 2.22E-02       |
| <i>Coprinus</i>      | 1.45E+02           | 4.20E-02       | <i>Pleurotus</i>     | 2.43E+02           | 1.86E-02       | <i>Unknown</i>          | 5.53E+01           | 6.89E-02       |
| <i>Stropharia</i>    | 1.39E+02           | 4.17E-02       | <i>Lactocollybia</i> | 1.66E+02           | 2.72E-02       | <i>Psathyrella</i>      | 1.29E+02           | 2.94E-02       |
| <i>Agaricus</i>      | 1.08E+02           | 5.35E-02       | <i>Ompharina</i>     | 1.06E+02           | 4.20E-02       | <i>Unknown</i>          | 7.32E+01           | 5.16E-02       |
| <i>Favolaschia</i>   | 8.08E+01           | 7.08E-02       | <i>Unknown</i>       | 5.77E+01           | 7.73E-02       | <i>Tricholoma</i>       | 6.51E+01           | 5.77E-02       |
| <i>Marasmius</i>     | 1.99E+02           | 2.86E-02       | <i>Marasmius</i>     | 1.15E+02           | 3.79E-02       | <i>Gymnopilus</i>       | 9.08E+01           | 4.10E-02       |
| <i>Melanotus?</i>    | 1.25E+02           | 4.49E-02       | <i>Armillaria</i>    | 5.32E+01           | 8.20E-02       | <i>Buchwaldoboletus</i> | 1.10E+02           | 3.32E-02       |
| <i>Pleurotus</i>     | 1.39E+02           | 4.02E-02       | <i>Oudemansiella</i> | 9.65E+01           | 4.49E-02       | <i>Mycena</i>           | 7.05E+01           | 5.14E-02       |

| <i>Tricholoma</i>    | 8.00E+01                 | 6.89E-02             | <i>Micromphale</i>  | 1.03E+02                 | 4.20E-02             | <i>Unknown</i>       | 5.66E+01                 | 6.41E-02             |
|----------------------|--------------------------|----------------------|---------------------|--------------------------|----------------------|----------------------|--------------------------|----------------------|
| <i>Russula</i>       | 1.90E+02                 | 2.89E-02             | <i>Armillaria</i>   | 7.13E+01                 | 6.06E-02             | <i>Unknown</i>       | 5.83E+01                 | 6.17E-02             |
| <i>Pleurotus</i>     | 7.48E+01                 | 7.19E-02             | <i>Psathyrella</i>  | 7.52E+01                 | 5.69E-02             | <i>Ramaria</i>       | 1.24E+02                 | 2.90E-02             |
| <i>Psathyrella</i>   | 7.59E+01                 | 7.08E-02             | <i>Unknown</i>      | 6.71E+01                 | 6.28E-02             | <i>Armillaria</i>    | 6.13E+01                 | 5.82E-02             |
| <i>Hypholoma</i>     | 1.17E+02                 | 4.56E-02             | <i>Russula</i>      | 2.17E+02                 | 1.94E-02             | <i>Naematoloma</i>   | 1.16E+02                 | 3.07E-02             |
| <i>Tricholoma</i>    | 1.28E+02                 | 4.09E-02             | <i>Unknown</i>      | 1.25E+02                 | 3.36E-02             | <i>Crepidotus</i>    | 1.61E+02                 | 2.21E-02             |
| <i>Coprinus</i>      | 1.62E+02                 | 3.24E-02             | <i>Unknown</i>      | 7.28E+01                 | 5.72E-02             | <i>Oudemansiella</i> | 2.06E+02                 | 1.71E-02             |
| <i>Armillaria</i>    | 7.42E+01                 | 7.03E-02             | <i>Unknown</i>      | 1.45E+02                 | 2.85E-02             | <i>Armillaria</i>    | 5.47E+01                 | 6.45E-02             |
| <i>Gymnopilus</i>    | 6.62E+01                 | 7.72E-02             | <i>Pleurotus</i>    | 6.59E+01                 | 6.26E-02             | <i>Armillaria</i>    | 5.85E+01                 | 5.98E-02             |
| <i>Epithele</i>      | 2.02E+02                 | 3.25E-02             | <i>Agaricus</i>     | 5.46E+01                 | 7.55E-02             | <i>Omphalina</i>     | 9.07E+01                 | 3.83E-02             |
| <i>Rhodocollybia</i> | 1.15E+02                 | 4.38E-02             | <i>Coprinus</i>     | 0.00E+00                 | -9.77E-02            | <i>Unknown</i>       | 1.04E+02                 | 3.33E-02             |
| <i>Leucocoprinus</i> | 8.35E+01                 | 5.98E-02             | <i>Pholiota</i>     | 8.11E+01                 | 5.08E-02             | <i>Schizophyllum</i> | 5.17E+01                 | 6.68E-02             |
| <i>Psathyrella</i>   | 1.11E+02                 | 4.48E-02             | <i>Unknown</i>      | 1.07E+02                 | 3.80E-02             | <i>Xeromphalina</i>  | 8.09E+01                 | 4.25E-02             |
| <i>Panellus</i>      | 8.88E+01                 | 5.55E-02             | <i>Pleurotus</i>    | 8.02E+01                 | 5.08E-02             | <i>Armillaria</i>    | 4.65E+01                 | 7.37E-02             |
| <i>Panellus</i>      | 1.17E+02                 | 4.17E-02             | <i>Psathyrella</i>  | 8.66E+01                 | 4.68E-02             | <i>Favolaschia</i>   | 1.02E+02                 | 3.36E-02             |
| <i>Marasmius</i>     | 1.09E+02                 | 4.46E-02             | <i>Marasmiellus</i> | 9.19E+01                 | 4.41E-02             | <i>Gymnopus</i>      | 1.03E+02                 | 3.29E-02             |
| <i>Dacrymycetes</i>  | 5.15E+01                 | 9.27E-02             | <i>Xeromphalina</i> | 4.88E+01                 | 8.19E-02             | <i>Filoboletus</i>   | 6.20E+01                 | 5.46E-02             |
| <i>Gloiocephala</i>  | 1.08E+02                 | 4.38E-02             | <i>Hypholoma</i>    | 1.35E+02                 | 2.94E-02             | <i>Lyophyllum</i>    | 7.43E+01                 | 4.56E-02             |
| <b>Species</b>       | <b>TF<sub>agar</sub></b> | <b>Dry weight(g)</b> | <b>Species</b>      | <b>TF<sub>agar</sub></b> | <b>Dry weight(g)</b> | <b>Species</b>       | <b>TF<sub>agar</sub></b> | <b>Dry weight(g)</b> |
| <i>Phaeolepiota</i>  | 6.67E+01                 | 7.04E-02             | <i>Cyphella</i>     | 7.51E+01                 | 5.30E-02             | <i>Gymnopus</i>      | 2.85E+02                 | 1.18E-02             |
| <i>Hypholoma</i>     | 1.14E+02                 | 2.94E-02             | <i>Armillaria</i>   | 6.64E+01                 | 4.34E-02             | <i>Hericium</i>      | 1.00E+02                 | 2.49E-02             |

|                      |          |          |                    |          |          |                      |          |          |
|----------------------|----------|----------|--------------------|----------|----------|----------------------|----------|----------|
| <i>Armillaria</i>    | 5.31E+01 | 6.30E-02 | <i>Unknown</i>     | 6.55E+01 | 4.39E-02 | <i>Pholiota</i>      | 3.58E+01 | 6.96E-02 |
| <i>Gymnopilus</i>    | 8.22E+01 | 4.06E-02 | <i>Hypsizygos</i>  | 1.26E+02 | 2.29E-02 | <i>Oudemansiella</i> | 8.87E+01 | 2.80E-02 |
| <i>Schizophyllum</i> | 4.01E+01 | 8.26E-02 | <i>Hypholoma</i>   | 1.02E+02 | 2.77E-02 | <i>Unknown</i>       | 6.21E+01 | 3.99E-02 |
| <i>Unknown</i>       | 9.70E+01 | 3.38E-02 | <i>Coprinus</i>    | 9.75E+01 | 2.90E-02 | <i>Lyophyllum</i>    | 2.37E+01 | 1.04E-01 |
| <i>Respinatus</i>    | 9.62E+01 | 3.40E-02 | <i>Pleurotus</i>   | 1.21E+02 | 2.34E-02 | <i>Hypholoma</i>     | 9.43E+01 | 2.62E-02 |
| <i>Coprinus</i>      | 6.78E+01 | 4.80E-02 | <i>Panus</i>       | 7.37E+01 | 3.82E-02 | <i>Phyllotopsis</i>  | 1.07E+02 | 2.31E-02 |
| <i>Pleurotus</i>     | 7.72E+01 | 4.21E-02 | <i>Campanella</i>  | 5.71E+01 | 4.91E-02 | <i>Chlorophyllum</i> | 1.09E+02 | 2.25E-02 |
| <i>Hypholoma</i>     | 1.18E+02 | 2.75E-02 | <i>Lyophyllum</i>  | 2.69E+01 | 1.04E-01 | <i>Tremella</i>      | 5.91E+01 | 4.14E-02 |
| <i>Unknown</i>       | 1.32E+02 | 2.43E-02 | <i>Unknown</i>     | 9.39E+01 | 2.97E-02 | <i>Oudemansiella</i> | 6.53E+01 | 3.68E-02 |
| <i>Armillaria</i>    | 4.91E+01 | 6.44E-02 | <i>Unknown</i>     | 1.10E+02 | 2.53E-02 | <i>Hohenbuehelia</i> | 5.12E+01 | 4.67E-02 |
| <i>Tremella</i>      | 6.25E+01 | 5.05E-02 | <i>Pluteus</i>     | 5.92E+01 | 4.69E-02 | <i>Pleurotus</i>     | 3.56E+01 | 6.71E-02 |
| <i>Omphalotus</i>    | 7.73E+01 | 4.03E-02 | <i>Phallus</i>     | 7.46E+01 | 3.72E-02 | <i>Gymnopus</i>      | 1.77E+02 | 1.35E-02 |
| <i>Unknown</i>       | 7.94E+01 | 3.91E-02 | <i>Armillaria</i>  | 4.85E+01 | 5.63E-02 | <i>Hypholoma</i>     | 1.12E+02 | 2.13E-02 |
| <i>Armillaria</i>    | 1.18E+02 | 2.64E-02 | <i>Lyophyllum</i>  | 4.37E+01 | 6.23E-02 | <i>Crepidotus</i>    | 6.40E+01 | 3.71E-02 |
| <i>Armillaria</i>    | 6.71E+01 | 4.61E-02 | <i>Unknown</i>     | 9.27E+01 | 2.94E-02 | <i>Unknown</i>       | 1.43E+02 | 1.65E-02 |
| <i>Pleurotus</i>     | 6.19E+01 | 4.96E-02 | <i>Pleurotus</i>   | 7.62E+01 | 3.57E-02 | <i>Unknown</i>       | 6.70E+01 | 3.52E-02 |
| <i>Geastrum</i>      | 4.88E+01 | 6.26E-02 | <i>Dictyopanus</i> | 1.06E+02 | 2.56E-02 | <i>Hohenbuehelia</i> | 5.64E+01 | 4.15E-02 |
| <i>Oudemansiella</i> | 7.97E+01 | 3.84E-02 | <i>Hypholoma</i>   | 9.41E+01 | 2.87E-02 | <i>Omphalotus</i>    | 6.85E+01 | 3.39E-02 |
| <i>Marasmius</i>     | 9.50E+01 | 3.19E-02 | <i>Unknown</i>     | 8.20E+01 | 3.27E-02 | <i>Hohenbuehelia</i> | 2.73E+01 | 8.50E-02 |
| <i>Pholiota</i>      | 9.77E+01 | 3.10E-02 | <i>Omphalotus</i>  | 7.83E+01 | 3.42E-02 | <i>Pleurotus</i>     | 5.14E+01 | 4.51E-02 |
| <i>Collybia</i>      | 6.26E+01 | 4.83E-02 | <i>Lentinus</i>    | 5.29E+01 | 5.04E-02 | <i>Clitocybe</i>     | 5.69E+01 | 4.07E-02 |
| <i>Panellus</i>      | 6.78E+01 | 4.45E-02 | <i>Armillaria</i>  | 7.01E+01 | 3.79E-02 | <i>Unknown</i>       | 1.26E+02 | 1.84E-02 |

| <i>Marasmius</i>     | 6.78E+01                 | 4.41E-02             | <i>Marasmius</i>         | 1.26E+02                 | 2.11E-02             | <i>Pholiota</i>       | 4.18E+01                 | 5.51E-02             |
|----------------------|--------------------------|----------------------|--------------------------|--------------------------|----------------------|-----------------------|--------------------------|----------------------|
| <i>Unknown</i>       | 7.12E+01                 | 4.19E-02             | <i>Armillaria</i>        | 9.55E+01                 | 2.77E-02             | <i>Chaetocalathus</i> | 5.03E+01                 | 4.55E-02             |
| <i>Filoboletus</i>   | 3.93E+01                 | 7.58E-02             | <i>Unknown</i>           | 4.95E+01                 | 5.32E-02             | <i>Omphalotus</i>     | 7.91E+01                 | 2.89E-02             |
| <i>Schizophyllum</i> | 5.85E+01                 | 5.07E-02             | <i>Mycoleptodonoides</i> | 1.09E+02                 | 2.40E-02             | <i>Dictyopanus</i>    | 5.85E+01                 | 3.91E-02             |
| <i>Unknown</i>       | 5.89E+01                 | 5.01E-02             | <i>Polyporus</i>         | 7.45E+01                 | 3.48E-02             | <i>Hohenbuehelia</i>  | 4.78E+01                 | 4.78E-02             |
| <i>Mycena</i>        | 1.11E+02                 | 2.66E-02             | <i>Phyllotopsis</i>      | 8.73E+01                 | 2.97E-02             | <i>Daedalea</i>       | 7.64E+01                 | 2.97E-02             |
| <i>Auricularia</i>   | 9.23E+01                 | 3.18E-02             | <i>Armillaria</i>        | 6.51E+01                 | 3.97E-02             | <i>Lyophyllum</i>     | 3.14E+01                 | 7.24E-02             |
| <i>Oudemansiella</i> | 4.70E+01                 | 6.23E-02             | <i>Ossicaulis</i>        | 9.41E+01                 | 2.70E-02             | <i>Lentinus</i>       | 9.71E+01                 | 2.34E-02             |
| <i>Dictyopanus</i>   | 5.92E+01                 | 4.94E-02             | <i>Auricularia</i>       | 9.70E+01                 | 2.62E-02             | <i>Psathyrella</i>    | 6.15E+01                 | 3.69E-02             |
| <i>Hypholoma</i>     | 1.02E+02                 | 2.88E-02             | <i>Phellinus</i>         | 6.18E+01                 | 4.09E-02             | <i>Unknown</i>        | 6.93E+01                 | 3.27E-02             |
| <i>Marasmius</i>     | 5.42E+01                 | 5.37E-02             | <i>Crepidotus</i>        | 4.57E+01                 | 5.49E-02             | <i>Schizophyllum</i>  | 8.60E+01                 | 2.56E-02             |
| <b>Species</b>       | <b>TF<sub>agar</sub></b> | <b>Dry weight(g)</b> | <b>Species</b>           | <b>TF<sub>agar</sub></b> | <b>Dry weight(g)</b> | <b>Species</b>        | <b>TF<sub>agar</sub></b> | <b>Dry weight(g)</b> |
| <i>Mycena</i>        | 8.20E+01                 | 3.55E-02             | <i>Pulveroboletus</i>    | 8.03E+01                 | 3.12E-02             | <i>Unknown</i>        | 1.29E+02                 | 1.70E-02             |
| <i>Naematoloma</i>   | 5.92E+01                 | 3.69E-02             | <i>Tremella</i>          | 3.94E+01                 | 5.14E-02             | <i>Mycena</i>         | 1.42E+02                 | 1.28E-02             |
| <i>Microporus</i>    | 8.73E+01                 | 2.50E-02             | <i>Panellus</i>          | 7.09E+01                 | 2.85E-02             | <i>Paxillus</i>       | 3.29E+01                 | 5.53E-02             |
| <i>Marasmiellus</i>  | 4.44E+01                 | 4.92E-02             | <i>Marasmiellus</i>      | 7.70E+01                 | 2.61E-02             | <i>Pholiota</i>       | 3.59E+01                 | 5.05E-02             |
| <i>Armillaria</i>    | 5.10E+01                 | 4.28E-02             | <i>Gymnopus</i>          | 4.95E+01                 | 4.05E-02             | <i>Cyphella</i>       | 5.57E+01                 | 3.24E-02             |
| <i>Unknown</i>       | 1.09E+02                 | 2.00E-02             | <i>Marasmius</i>         | 5.12E+01                 | 3.91E-02             | <i>Mycena</i>         | 5.38E+01                 | 3.33E-02             |
| <i>Gumnopilus</i>    | 5.94E+01                 | 3.67E-02             | <i>Marasmiaceae</i>      | 6.06E+01                 | 4.45E-02             | <i>Schizophyllum</i>  | 7.19E+01                 | 2.48E-02             |
| <i>Flammulina</i>    | 1.16E+02                 | 1.88E-02             | <i>Omphalotus</i>        | 5.02E+01                 | 3.93E-02             | <i>Dictyopanus</i>    | 6.22E+01                 | 2.87E-02             |
| <i>Unknown</i>       | 7.57E+01                 | 2.85E-02             | <i>Mycoleptodonoides</i> | 9.86E+01                 | 1.99E-02             | <i>Hypholoma</i>      | 7.32E+01                 | 2.43E-02             |

|                     |          |          |                      |          |          |                      |          |          |
|---------------------|----------|----------|----------------------|----------|----------|----------------------|----------|----------|
| <i>Panellus</i>     | 8.34E+01 | 2.59E-02 | <i>Mycena</i>        | 7.08E+01 | 2.75E-02 | <i>Gymnopus</i>      | 6.14E+01 | 2.87E-02 |
| <i>Hypholoma</i>    | 8.53E+01 | 2.52E-02 | <i>Hypholoma</i>     | 6.52E+01 | 2.98E-02 | <i>Crinipellis</i>   | 3.77E+01 | 4.66E-02 |
| <i>Omphalotus</i>   | 7.52E+01 | 2.85E-02 | <i>Hypholoma</i>     | 6.01E+01 | 3.23E-02 | <i>Lactocollybia</i> | 5.37E+01 | 3.26E-02 |
| <i>Omphalotus</i>   | 7.48E+01 | 2.86E-02 | <i>Lyophyllum</i>    | 3.36E+01 | 5.77E-02 | <i>Strobilurus</i>   | 2.79E+01 | 6.27E-02 |
| <i>Micromphale</i>  | 7.61E+01 | 2.80E-02 | <i>Phyllotopsis</i>  | 9.47E+01 | 2.05E-02 | <i>Marasmius</i>     | 3.64E+01 | 4.78E-02 |
| <i>Pleurotus</i>    | 7.47E+01 | 2.85E-02 | <i>Anellaria?</i>    | 3.07E+01 | 6.30E-02 | <i>Panellus</i>      | 4.77E+01 | 3.64E-02 |
| <i>Marasmiellus</i> | 6.01E+01 | 3.54E-02 | <i>Collybia</i>      | 9.78E+01 | 1.95E-02 | <i>Lentinus</i>      | 9.33E+01 | 1.86E-02 |
| <i>Mycena</i>       | 5.45E+01 | 3.90E-02 | <i>Marasmius</i>     | 7.83E+01 | 2.44E-02 | <i>Gloiocephala</i>  | 1.82E+01 | 9.52E-02 |
| <i>Omphalotus</i>   | 5.12E+01 | 4.13E-02 | <i>Polyporus</i>     | 4.95E+01 | 3.86E-02 | <i>Marasmius</i>     | 4.54E+01 | 3.80E-02 |
| <i>Dictyopanus</i>  | 4.19E+01 | 5.05E-02 | <i>Panus</i>         | 6.81E+01 | 2.80E-02 | <i>Unknown</i>       | 3.00E+01 | 5.73E-02 |
| <i>Tricholoma</i>   | 4.70E+01 | 4.49E-02 | <i>Xerula</i>        | 7.60E+01 | 2.50E-02 | <i>Unknown</i>       | 4.61E+01 | 3.73E-02 |
| <i>Psathyrella</i>  | 8.24E+01 | 2.56E-02 | <i>Hohenbuehelia</i> | 3.04E+01 | 6.19E-02 | <i>Pleurotus</i>     | 6.80E+01 | 2.52E-02 |
| <i>Mycena</i>       | 4.68E+01 | 4.50E-02 | <i>Roseofomes</i>    | 4.33E+01 | 4.34E-02 | <i>Pholiota</i>      | 7.71E+01 | 2.22E-02 |
| <i>Tremella</i>     | 3.89E+01 | 5.41E-02 | <i>Psathyrella</i>   | 5.24E+01 | 3.59E-02 | <i>Collybia?</i>     | 2.24E+01 | 7.60E-02 |
| <i>Unknown</i>      | 5.56E+01 | 3.78E-02 | <i>Hohenbuehelia</i> | 5.23E+01 | 3.58E-02 | <i>Unknown</i>       | 9.41E+01 | 1.81E-02 |
| <i>Marasmius</i>    | 5.04E+01 | 4.17E-02 | <i>Lepiota</i>       | 2.90E+01 | 6.43E-02 | <i>Unknown</i>       | 5.41E+01 | 3.14E-02 |
| <i>Crepidotus</i>   | 4.45E+01 | 4.68E-02 | <i>Mar</i>           | 5.66E+01 | 3.27E-02 | <i>Marasmius</i>     | 4.17E+01 | 4.07E-02 |
| <i>Termitomyces</i> | 3.69E+01 | 5.64E-02 | <i>Agaricus</i>      | 9.84E+01 | 1.88E-02 | <i>Hypholoma</i>     | 9.18E+01 | 1.85E-02 |
| <i>Suillus</i>      | 1.03E+02 | 2.01E-02 | <i>Hohenbuehelia</i> | 4.04E+01 | 4.58E-02 | <i>Unknown</i>       | 4.68E+01 | 3.62E-02 |
| <i>Pholiota</i>     | 1.08E+02 | 1.93E-02 | <i>Strobilurus</i>   | 7.73E+01 | 2.39E-02 | <i>Mycena</i>        | 5.00E+01 | 3.39E-02 |
| <i>Psathyrella</i>  | 5.34E+01 | 3.88E-02 | <i>Hohenbuehelia</i> | 4.95E+01 | 3.72E-02 | <i>Lyophyllum</i>    | 2.53E+01 | 6.66E-02 |
| <i>Unknown</i>      | 8.78E+01 | 2.36E-02 | <i>Dictyopanus</i>   | 4.26E+01 | 4.32E-02 | <i>Unknown</i>       | 3.30E+01 | 5.11E-02 |

| <i>Marasmius</i>         | 7.58E+01                 | 2.71E-02             | <i>Marasmius</i>         | 1.01E+02                 | 1.82E-02             | <i>Pleurotus</i>     | 5.74E+01                 | 2.93E-02             |
|--------------------------|--------------------------|----------------------|--------------------------|--------------------------|----------------------|----------------------|--------------------------|----------------------|
| <i>Pleurotus</i>         | 6.15E+01                 | 3.32E-02             | <i>Hypholoma</i>         | 7.22E+01                 | 2.54E-02             | <i>Unknown</i>       | 3.88E+01                 | 4.33E-02             |
| <i>Schizophyllum</i>     | 7.29E+01                 | 2.79E-02             | <i>Gymnopus</i>          | 7.93E+01                 | 2.31E-02             | <i>Oudemansiella</i> | 7.96E+01                 | 2.11E-02             |
| <i>Pholiota</i>          | 6.57E+01                 | 3.10E-02             | <i>Filoboletus</i>       | 4.98E+01                 | 3.67E-02             | <i>Lepista</i>       | 4.94E+01                 | 3.40E-02             |
| <b>Species</b>           | <b>TF<sub>agar</sub></b> | <b>Dry weight(g)</b> | <b>Species</b>           | <b>TF<sub>agar</sub></b> | <b>Dry weight(g)</b> | <b>Species</b>       | <b>TF<sub>agar</sub></b> | <b>Dry weight(g)</b> |
| <i>Schizophyllum</i>     | 3.51E+01                 | 5.77E-02             | <i>Pholiota</i>          | 7.80E+01                 | 2.35E-02             | <i>Hypholoma</i>     | 6.42E+01                 | 2.62E-02             |
| <i>Psathyrella</i>       | 6.66E+01                 | 3.05E-02             | <i>Naematoloma</i>       | 1.15E+02                 | 1.59E-02             | <i>Marasmius</i>     | 3.73E+01                 | 4.45E-02             |
| <i>Mycena</i>            | 3.99E+01                 | 4.15E-02             | <i>Auricularia</i>       | 5.24E+01                 | 2.80E-02             | <i>Kuehneromyces</i> | 1.12E+02                 | 1.17E-02             |
| <i>Pholiota</i>          | 6.68E+01                 | 2.48E-02             | <i>Gloiocephala</i>      | 3.45E+01                 | 4.24E-02             | <i>Xeromphalina</i>  | 4.86E+01                 | 2.68E-02             |
| <i>Pholiota</i>          | 8.55E+01                 | 1.94E-02             | <i>Unknown</i>           | 6.75E+01                 | 2.16E-02             | <i>Armillaria</i>    | 2.59E+01                 | 5.03E-02             |
| <i>Schizophyllum</i>     | 4.13E+01                 | 3.99E-02             | <i>Auricularia</i>       | 7.25E+01                 | 2.01E-02             | <i>Marasmius</i>     | 9.35E+01                 | 1.39E-02             |
| <i>Lyophyllum</i>        | 3.08E+01                 | 5.34E-02             | <i>Schizophyllum</i>     | 2.12E+01                 | 6.81E-02             | <i>Xeromphalina</i>  | 7.04E+01                 | 1.85E-02             |
| <i>Dacryomyces</i>       | 3.95E+01                 | 4.15E-02             | <i>Neolentinus</i>       | 5.66E+01                 | 2.55E-02             | <i>Lentinus</i>      | 5.67E+01                 | 2.28E-02             |
| <i>Guepinia</i>          | 4.24E+01                 | 3.86E-02             | <i>Xeromphalina</i>      | 4.90E+01                 | 2.94E-02             | <i>Pholiota</i>      | 8.41E+01                 | 1.53E-02             |
| <i>Schizophyllum</i>     | 2.35E+01                 | 6.94E-02             | <i>Oudemansiella</i>     | 8.26E+01                 | 1.74E-02             | <i>Trametes</i>      | 6.65E+01                 | 1.93E-02             |
| <i>Schizophyllum</i>     | 2.75E+01                 | 5.92E-02             | <i>Unknown</i>           | 7.05E+01                 | 2.03E-02             | <i>Guepinia</i>      | 3.67E+01                 | 3.49E-02             |
| <i>Xeromphalina</i>      | 4.94E+01                 | 3.29E-02             | <i>Marasmiellus</i>      | 2.51E+01                 | 5.69E-02             | <i>Hypholoma</i>     | 1.00E+02                 | 1.27E-02             |
| <i>Gloiocephala</i>      | 6.21E+01                 | 2.60E-02             | <i>Mycoleptodonoides</i> | 7.31E+01                 | 1.95E-02             | <i>Ossicaulis</i>    | 7.79E+01                 | 1.63E-02             |
| <i>Polyporus</i>         | 9.60E+01                 | 1.68E-02             | <i>Unknown</i>           | 3.56E+01                 | 4.01E-02             | <i>Collybia</i>      | 7.52E+01                 | 1.68E-02             |
| <i>Mycena</i>            | 1.00E+02                 | 1.61E-02             | <i>Unknown</i>           | 7.13E+01                 | 1.99E-02             | <i>Flammulina</i>    | 5.46E+01                 | 2.32E-02             |
| <i>Mycoleptodonoides</i> | 7.49E+01                 | 2.14E-02             | <i>Pholiota</i>          | 2.40E+02                 | 5.87E-03             | <i>Neonothopanus</i> | 3.42E+01                 | 3.69E-02             |

| <i>Armillaria</i>    | 3.58E+01                 | 4.47E-02             | <i>Marasmiellus</i>      | 1.76E+02                 | 7.97E-03             | <i>Lyophyllum</i>        | 2.89E+01                 | 4.36E-02             |
|----------------------|--------------------------|----------------------|--------------------------|--------------------------|----------------------|--------------------------|--------------------------|----------------------|
| <i>Hohenbuehelia</i> | 2.33E+01                 | 6.84E-02             | <i>Hypholoma</i>         | 3.71E+01                 | 3.77E-02             | <i>Lentinus</i>          | 7.41E+01                 | 1.70E-02             |
| <i>Dictyopanus</i>   | 6.27E+01                 | 2.54E-02             | <i>Oudemansiella</i>     | 5.94E+01                 | 2.34E-02             | <i>Neolentinus</i>       | 4.81E+01                 | 2.62E-02             |
| <i>Unknown</i>       | 4.62E+01                 | 3.44E-02             | <i>Neolentinus</i>       | 6.05E+01                 | 2.30E-02             | <i>Panellus</i>          | 4.03E+01                 | 3.12E-02             |
| <i>Armillaria</i>    | 4.04E+01                 | 3.87E-02             | <i>Unknown</i>           | 5.23E+01                 | 2.65E-02             | <i>Panellus</i>          | 6.82E+01                 | 1.83E-02             |
| <i>Polyporus</i>     | 5.00E+01                 | 3.13E-02             | <i>Unknown</i>           | 9.72E+01                 | 1.42E-02             | <i>Omphalotus</i>        | 4.53E+01                 | 2.76E-02             |
| <i>Hypholoma</i>     | 6.17E+01                 | 2.53E-02             | <i>Inonotus</i>          | 7.66E+01                 | 1.80E-02             | <i>Omphalotus</i>        | 4.87E+01                 | 2.55E-02             |
| <i>Unknown</i>       | 5.33E+01                 | 2.92E-02             | <i>Coprinus</i>          | 3.04E+01                 | 4.52E-02             | <i>Marasmius</i>         | 4.11E+01                 | 3.01E-02             |
| <i>Pleurotus</i>     | 5.06E+01                 | 3.04E-02             | <i>Unknown</i>           | 4.62E+01                 | 2.97E-02             | <i>Ganoderma</i>         | 6.96E+01                 | 1.77E-02             |
| <i>Filoboletus</i>   | 8.27E+01                 | 1.86E-02             | <i>Hypholoma</i>         | 6.37E+01                 | 2.15E-02             | <i>Unknown</i>           | 7.28E+01                 | 1.69E-02             |
| <i>Scleroderma</i>   | 6.57E+01                 | 2.32E-02             | <i>Pleurocybella</i>     | 4.86E+01                 | 2.82E-02             | <i>Unknown</i>           | 1.71E+02                 | 7.16E-03             |
| <i>Unknown</i>       | 6.43E+01                 | 2.37E-02             | <i>Laetiporus</i>        | 6.03E+01                 | 2.26E-02             | <i>Flammulina</i>        | 4.28E+01                 | 2.85E-02             |
| <i>Guepinia</i>      | 3.39E+01                 | 4.50E-02             | <i>Panellus</i>          | 3.59E+01                 | 3.77E-02             | <i>Pleurotus</i>         | 4.39E+01                 | 2.75E-02             |
| <i>Crepidotus</i>    | 2.42E+01                 | 6.27E-02             | <i>Mycoleptodonoides</i> | 7.90E+01                 | 1.70E-02             | <i>Unknown</i>           | 2.75E+01                 | 4.38E-02             |
| <i>Mycena</i>        | 5.28E+01                 | 2.86E-02             | <i>Armillaria</i>        | 4.10E+01                 | 3.27E-02             | <i>Clitocybella</i>      | 5.61E+01                 | 2.15E-02             |
| <i>Unknown</i>       | 5.76E+01                 | 2.63E-02             | <i>Pleurotus</i>         | 4.50E+01                 | 2.98E-02             | <i>Agrocybe</i>          | 5.69E+01                 | 2.11E-02             |
| <i>Panellus</i>      | 5.32E+01                 | 2.84E-02             | <i>Omphalina</i>         | 3.34E+01                 | 3.98E-02             | <i>Collybia</i>          | 5.03E+01                 | 2.38E-02             |
| <i>Auricularia</i>   | 4.08E+01                 | 3.69E-02             | <i>Unknown</i>           | 1.76E+01                 | 7.55E-02             | <i>Cyptotrama</i>        | 4.69E+01                 | 2.53E-02             |
| <i>Omphalotus</i>    | 6.19E+01                 | 2.42E-02             | <i>Entoloma</i>          | 7.48E+01                 | 1.77E-02             | <i>Pleurotus</i>         | 5.52E+01                 | 2.15E-02             |
| <b>Species</b>       | <b>TF<sub>agar</sub></b> | <b>Dry weight(g)</b> | <b>Species</b>           | <b>TF<sub>agar</sub></b> | <b>Dry weight(g)</b> | <b>Species</b>           | <b>TF<sub>agar</sub></b> | <b>Dry weight(g)</b> |
| <i>Marasmius</i>     | 4.27E+01                 | 3.45E-02             | <i>Dictyopanus</i>       | 3.80E+01                 | 3.48E-02             | <i>Mycoleptodonoides</i> | 4.31E+01                 | 2.75E-02             |

|                     |          |          |                      |          |          |                      |          |          |
|---------------------|----------|----------|----------------------|----------|----------|----------------------|----------|----------|
| <i>Crepidotus</i>   | 7.07E+01 | 2.08E-02 | <i>Unknown</i>       | 5.59E+01 | 2.36E-02 | <i>Unknown</i>       | 4.22E+01 | 2.79E-02 |
| <i>Unknown</i>      | 5.57E+01 | 2.64E-02 | <i>Lentinellus</i>   | 6.00E+01 | 2.20E-02 | <i>Filoboletus</i>   | 4.05E+01 | 2.90E-02 |
| <i>Marasmius</i>    | 6.49E+01 | 1.80E-02 | <i>Xeromphalina</i>  | 3.31E+01 | 3.06E-02 | <i>Pleurotus</i>     | 5.34E+01 | 1.69E-02 |
| <i>Pleurotus</i>    | 4.24E+01 | 2.75E-02 | <i>Xeromphalina</i>  | 3.22E+01 | 3.15E-02 | <i>Auricularia</i>   | 6.86E+01 | 1.32E-02 |
| <i>Unknown</i>      | 8.99E+01 | 1.29E-02 | <i>Pleurotus</i>     | 4.29E+01 | 2.36E-02 | <i>Respinatus?</i>   | 3.54E+01 | 2.55E-02 |
| <i>Neolentinus</i>  | 4.65E+01 | 2.49E-02 | <i>Unknown</i>       | 2.88E+01 | 3.49E-02 | <i>Collybia</i>      | 1.79E+02 | 5.04E-03 |
| <i>Fuscoporia</i>   | 5.66E+01 | 2.04E-02 | <i>Lentinus</i>      | 3.83E+01 | 2.63E-02 | <i>Polyporus</i>     | 4.56E+01 | 1.97E-02 |
| <i>Unknown</i>      | 4.49E+01 | 2.55E-02 | <i>Schizophyllum</i> | 4.38E+01 | 2.28E-02 | <i>Favolaschia</i>   | 4.86E+01 | 1.85E-02 |
| <i>Unknown</i>      | 4.18E+01 | 2.73E-02 | <i>Pleurocybella</i> | 2.02E+01 | 4.92E-02 | <i>Lentinus</i>      | 8.48E+01 | 1.06E-02 |
| <i>Omphalotus</i>   | 4.11E+01 | 2.76E-02 | <i>Lepista</i>       | 2.73E+01 | 3.64E-02 | <i>Pleurotus</i>     | 8.96E+01 | 9.98E-03 |
| <i>Xeromphalina</i> | 4.03E+01 | 2.81E-02 | <i>Gymnopilus</i>    | 4.88E+01 | 2.03E-02 | <i>Trogia</i>        | 6.48E+01 | 1.38E-02 |
| <i>Marasmiellus</i> | 4.59E+01 | 2.47E-02 | <i>Hohenbuehelia</i> | 7.13E+01 | 1.39E-02 | <i>Dictyopanus</i>   | 4.22E+01 | 2.09E-02 |
| <i>Naematoloma</i>  | 5.40E+01 | 2.10E-02 | <i>Marasmius</i>     | 4.23E+01 | 2.32E-02 | <i>Flammulina</i>    | 3.76E+01 | 2.35E-02 |
| <i>Mycena</i>       | 2.83E+01 | 3.98E-02 | <i>Collybia</i>      | 3.87E+01 | 2.53E-02 | <i>Xeromphalina</i>  | 7.31E+01 | 1.21E-02 |
| <i>Unknown</i>      | 4.51E+01 | 2.50E-02 | <i>Oudemansiella</i> | 6.87E+01 | 1.42E-02 | <i>Oudemansiella</i> | 6.91E+01 | 1.27E-02 |
| <i>Lentinus</i>     | 4.93E+01 | 2.27E-02 | <i>Oudemansiella</i> | 4.81E+01 | 2.02E-02 | <i>Unknown</i>       | 7.56E+01 | 1.16E-02 |
| <i>Unknown</i>      | 7.31E+01 | 1.53E-02 | <i>Lepiota</i>       | 1.12E+02 | 8.59E-03 | <i>Lentinus</i>      | 9.28E+01 | 9.39E-03 |
| <i>Pleurotus</i>    | 6.62E+01 | 1.67E-02 | <i>Panellus</i>      | 5.74E+01 | 1.67E-02 | <i>Pleurotus</i>     | 6.05E+01 | 1.42E-02 |
| <i>Strobilurus</i>  | 2.82E+01 | 3.93E-02 | <i>Panellus</i>      | 4.06E+01 | 2.36E-02 | <i>Pholiota</i>      | 6.52E+01 | 1.32E-02 |
| <i>Flammulina</i>   | 4.93E+01 | 2.23E-02 | <i>Unknown</i>       | 5.03E+01 | 1.90E-02 | <i>Omphalina</i>     | 4.16E+01 | 2.04E-02 |
| <i>Xeromphalina</i> | 7.07E+01 | 1.55E-02 | <i>Dictyopanus</i>   | 3.51E+01 | 2.71E-02 | <i>Pholiota</i>      | 8.04E+01 | 1.06E-02 |
| <i>Micromphale</i>  | 6.19E+01 | 1.77E-02 | <i>Pholiota</i>      | 6.02E+01 | 1.58E-02 | <i>Auricularia</i>   | 5.99E+01 | 1.41E-02 |



| <i>Pleurotus</i>    | 3.64E+01                 | 3.00E-02             | <i>Xeromphalina</i>     | 3.17E+01                 | 2.98E-02             | <i>Mycoleptodonoides</i> | 5.99E+01                 | 1.41E-02             |
|---------------------|--------------------------|----------------------|-------------------------|--------------------------|----------------------|--------------------------|--------------------------|----------------------|
| <i>Marasmius</i>    | 6.24E+01                 | 1.73E-02             | <i>Schizophyllum</i>    | 2.97E+01                 | 3.16E-02             | <i>Collybia</i>          | 7.94E+01                 | 1.06E-02             |
| <i>Lentinus</i>     | 5.92E+01                 | 1.82E-02             | <i>Marasmiellus</i>     | 2.58E+01                 | 3.63E-02             | <i>Unknown</i>           | 5.31E+01                 | 1.57E-02             |
| <i>Unknown</i>      | 5.51E+01                 | 1.95E-02             | <i>Unknown</i>          | 2.58E+01                 | 3.62E-02             | <i>Pholiota</i>          | 4.11E+01                 | 2.03E-02             |
| <i>Lyophyllum</i>   | 2.51E+01                 | 4.26E-02             | <i>Oudemansiella</i>    | 2.58E+02                 | 3.63E-03             | <i>Xeromphalina</i>      | 4.29E+01                 | 1.94E-02             |
| <i>Pholiota</i>     | 5.70E+01                 | 1.87E-02             | <i>Agrocybe</i>         | 2.42E+01                 | 3.85E-02             | <i>Fistulina</i>         | 9.29E+01                 | 8.93E-03             |
| <i>Phyllotopsis</i> | 3.07E+01                 | 3.45E-02             | <i>Armillaria</i>       | 5.69E+01                 | 1.62E-02             | <i>Polyporus</i>         | 5.35E+01                 | 1.55E-02             |
| <i>Marasmiellus</i> | 1.10E+02                 | 9.65E-03             | <i>Xeromphalina</i>     | 4.76E+01                 | 1.93E-02             | <i>Lactocollybia?</i>    | 3.23E+01                 | 2.56E-02             |
| <i>Xeromphalina</i> | 3.24E+01                 | 3.22E-02             | <i>Hohenbuehelia</i>    | 2.33E+01                 | 3.94E-02             | <i>Pleurotus</i>         | 5.20E+01                 | 1.58E-02             |
| <i>Pycnoporus</i>   | 3.92E+01                 | 2.63E-02             | <i>Anthracoephyllum</i> | 3.80E+01                 | 2.41E-02             | <i>Pleurotus</i>         | 3.26E+01                 | 2.51E-02             |
| <i>Armillaria</i>   | 5.87E+01                 | 1.76E-02             | <i>Calocybe</i>         | 2.10E+01                 | 4.37E-02             | <i>Pleurotus</i>         | 3.96E+01                 | 2.06E-02             |
| <i>Crepidotus</i>   | 3.10E+01                 | 3.32E-02             | <i>Pycnoporus</i>       | 2.47E+01                 | 3.69E-02             | <i>Schizophyllum</i>     | 3.53E+01                 | 2.31E-02             |
| <b>Species</b>      | <b>TF<sub>agar</sub></b> | <b>Dry weight(g)</b> | <b>Species</b>          | <b>TF<sub>agar</sub></b> | <b>Dry weight(g)</b> | <b>Species</b>           | <b>TF<sub>agar</sub></b> | <b>Dry weight(g)</b> |
| <i>Unknown</i>      | 7.03E+01                 | 1.46E-02             | <i>Marasmius</i>        | 5.39E+01                 | 1.69E-02             | <i>Xerula</i>            | 4.04E+01                 | 2.02E-02             |
| <i>Auricularia</i>  | 1.63E+01                 | 6.26E-02             | <i>Dictyopanus</i>      | 2.97E+01                 | 3.07E-02             | <i>Pholiota</i>          | 6.26E+01                 | 1.30E-02             |
| <i>Pholiota</i>     | 5.46E+01                 | 1.87E-02             | <i>Pholiota</i>         | 3.64E+01                 | 2.49E-02             | <i>Lenzites</i>          | 6.50E+01                 | 1.25E-02             |
| <i>Pleurotus</i>    | 6.95E+01                 | 1.46E-02             | <i>Suillus</i>          | 1.45E+01                 | 6.23E-02             | <i>Mycena</i>            | 2.76E+01                 | 2.92E-02             |
| <i>Psathyrella</i>  | 5.35E+01                 | 1.50E-02             | <i>Unknown</i>          | 5.49E+01                 | 1.28E-02             | <i>Marasmiellus</i>      | 7.80E+01                 | 7.93E-03             |
| <i>Unknown</i>      | 4.69E+01                 | 1.70E-02             | <i>Coprinius</i>        | 3.86E+01                 | 1.82E-02             | <i>Omphalotus</i>        | 5.93E+01                 | 1.04E-02             |
| <i>Fistulina</i>    | 1.04E+02                 | 7.65E-03             | <i>Polyporus</i>        | 6.94E+01                 | 1.01E-02             | <i>Hypholoma</i>         | 2.20E+01                 | 2.80E-02             |
| <i>Auricularia</i>  | 3.89E+01                 | 2.04E-02             | <i>Marasmiellus</i>     | 3.55E+01                 | 1.97E-02             | <i>Agaricus</i>          | 4.15E+01                 | 1.48E-02             |

|                      |          |          |                     |          |          |                       |          |          |
|----------------------|----------|----------|---------------------|----------|----------|-----------------------|----------|----------|
| <i>Hericium</i>      | 7.77E+01 | 1.02E-02 | <i>Unknown</i>      | 4.54E+01 | 1.54E-02 | <i>Auricularia</i>    | 1.31E+02 | 4.66E-03 |
| <i>Cyptotrama</i>    | 4.53E+01 | 1.75E-02 | <i>Unknown</i>      | 4.24E+01 | 1.64E-02 | <i>Marasmius</i>      | 4.09E+01 | 1.48E-02 |
| <i>Hypsizygus</i>    | 7.17E+01 | 1.10E-02 | <i>Mycena</i>       | 1.20E+01 | 5.75E-02 | <i>Micromphale</i>    | 4.30E+01 | 1.41E-02 |
| <i>Pycnoporus</i>    | 5.54E+01 | 1.43E-02 | <i>Fomitella</i>    | 6.48E+01 | 1.07E-02 | <i>Unknown</i>        | 3.33E+01 | 1.82E-02 |
| <i>Pleurotus</i>     | 5.81E+01 | 1.36E-02 | <i>Mycena</i>       | 2.32E+01 | 2.95E-02 | <i>Gloiocephala?</i>  | 5.30E+01 | 1.14E-02 |
| <i>Coprinus</i>      | 4.91E+01 | 1.60E-02 | <i>Xeromphalina</i> | 2.70E+01 | 2.53E-02 | <i>Chaetocalathus</i> | 3.08E+01 | 1.96E-02 |
| <i>Panellus</i>      | 5.63E+01 | 1.40E-02 | <i>Pholiota</i>     | 4.37E+01 | 1.56E-02 | <i>Pleurotus</i>      | 3.93E+01 | 1.53E-02 |
| <i>Lycoperdon</i>    | 2.91E+01 | 2.70E-02 | <i>Neolentinus</i>  | 3.41E+01 | 2.00E-02 | <i>Pholiota</i>       | 6.29E+01 | 9.52E-03 |
| <i>Marasmiellus</i>  | 4.28E+01 | 1.82E-02 | <i>Crepidotus</i>   | 3.27E+01 | 2.07E-02 | <i>Oudemansiella</i>  | 7.74E+01 | 7.73E-03 |
| <i>Calvatia</i>      | 5.25E+01 | 1.49E-02 | <i>Mycena</i>       | 3.85E+01 | 1.75E-02 | <i>Micromphale</i>    | 5.42E+01 | 1.09E-02 |
| <i>Lentinus</i>      | 7.32E+01 | 1.06E-02 | <i>Coriolus</i>     | 8.68E+01 | 7.75E-03 | <i>Panellus</i>       | 8.20E+01 | 7.19E-03 |
| <i>Hypholoma</i>     | 4.58E+01 | 1.70E-02 | <i>Xerula</i>       | 9.91E+01 | 6.77E-03 | <i>Pholiota</i>       | 4.53E+01 | 1.29E-02 |
| <i>Kuehneromyces</i> | 4.65E+01 | 1.67E-02 | <i>Panellus</i>     | 8.74E+01 | 7.67E-03 | <i>Xeromphalina</i>   | 3.27E+01 | 1.79E-02 |
| <i>Amanita</i>       | 3.36E+01 | 2.29E-02 | <i>Crepidotus</i>   | 5.48E+01 | 1.22E-02 | <i>Schizophyllum</i>  | 3.35E+01 | 1.73E-02 |
| <i>Panellus</i>      | 6.84E+01 | 1.12E-02 | <i>Filoboletus</i>  | 3.24E+01 | 2.06E-02 | <i>Clavicornia</i>    | 2.40E+01 | 2.41E-02 |
| <i>Pleurotus</i>     | 6.86E+01 | 1.12E-02 | <i>Micromphale</i>  | 7.09E+01 | 9.40E-03 | <i>Psathyrella</i>    | 3.43E+01 | 1.68E-02 |
| <i>Unknown</i>       | 1.31E+02 | 5.77E-03 | <i>Lepiota</i>      | 8.63E+01 | 7.66E-03 | <i>Unknown</i>        | 5.79E+01 | 9.96E-03 |
| <i>Phellinus</i>     | 5.09E+01 | 1.48E-02 | <i>Panellus</i>     | 5.32E+01 | 1.24E-02 | <i>Resupinatus</i>    | 8.83E+01 | 6.53E-03 |
| <i>Psathyrella</i>   | 4.50E+01 | 1.67E-02 | <i>Pholiota</i>     | 8.61E+01 | 7.63E-03 | <i>Lentinus</i>       | 6.31E+01 | 9.09E-03 |
| <i>Mycena</i>        | 2.51E+01 | 2.96E-02 | <i>Pholiota</i>     | 5.99E+01 | 1.09E-02 | <i>Lentinus</i>       | 4.98E+01 | 1.15E-02 |
| <i>Pleurotus</i>     | 3.94E+01 | 1.89E-02 | <i>Collybia</i>     | 6.44E+01 | 1.02E-02 | <i>Psathyrella</i>    | 2.56E+02 | 2.23E-03 |
| <i>Marasmius</i>     | 6.26E+01 | 1.18E-02 | <i>Marasmiellus</i> | 3.36E+01 | 1.94E-02 | <i>Hypholoma</i>      | 3.98E+01 | 1.44E-02 |

| <i>Psathyrella</i>  | 2.94E+01                 | 2.50E-02             | <i>Kuehneromyces</i> | 6.32E+01                 | 1.03E-02             | <i>Unknown</i>       | 1.83E+01                 | 3.12E-02             |
|---------------------|--------------------------|----------------------|----------------------|--------------------------|----------------------|----------------------|--------------------------|----------------------|
| <i>Hypholoma</i>    | 4.79E+01                 | 1.53E-02             | <i>Lentinus</i>      | 1.15E+02                 | 5.65E-03             | <i>Marasmiellus</i>  | 5.29E+01                 | 1.08E-02             |
| <i>Stropharia</i>   | 4.36E+01                 | 1.68E-02             | <i>Pholiota</i>      | 7.13E+01                 | 9.08E-03             | <i>Auricularia</i>   | 1.13E+02                 | 5.06E-03             |
| <i>Trogia</i>       | 4.10E+01                 | 1.78E-02             | <i>Marasmius</i>     | 1.11E+02                 | 5.69E-03             | <i>Marasmius</i>     | 8.00E+01                 | 7.09E-03             |
| <i>Marasmiellus</i> | 7.35E+01                 | 9.95E-03             | <i>Hypsizygyus</i>   | 1.49E+02                 | 4.21E-03             | <i>Hohenbuehelia</i> | 5.50E+01                 | 1.02E-02             |
| <b>Species</b>      | <b>TF<sub>agar</sub></b> | <b>Dry weight(g)</b> | <b>Species</b>       | <b>TF<sub>agar</sub></b> | <b>Dry weight(g)</b> | <b>Species</b>       | <b>TF<sub>agar</sub></b> | <b>Dry weight(g)</b> |
| <i>Marasmius</i>    | 3.52E+01                 | 1.57E-02             | <i>Anelaria</i>      | 3.30E+01                 | 1.35E-02             | <i>Oudemansiella</i> | 3.60E+01                 | 2.02E-02             |
| <i>Xeromphalina</i> | 6.12E+01                 | 9.03E-03             | <i>Micromphale</i>   | 4.07E+01                 | 1.08E-02             | <i>Coriolus</i>      | 5.39E+01                 | 1.35E-02             |
| <i>Pleurotus</i>    | 4.41E+01                 | 1.25E-02             | <i>Marasmius</i>     | 3.19E+01                 | 1.37E-02             | <i>Xeromphalina</i>  | 5.66E+01                 | 1.28E-02             |
| <i>Crepidotus</i>   | 5.20E+01                 | 1.06E-02             | <i>Lentinus</i>      | 3.94E+01                 | 1.09E-02             | <i>Omphalotus</i>    | 6.15E+01                 | 1.18E-02             |
| <i>Unknown</i>      | 2.90E+01                 | 1.89E-02             | <i>Marasmiellus</i>  | 4.21E+01                 | 1.02E-02             | <i>Polyporus</i>     | 3.90E+01                 | 1.81E-02             |
| <i>Hypsizygyus</i>  | 1.28E+02                 | 4.28E-03             | <i>Laetiporus</i>    | 6.86E+01                 | 6.25E-03             | <i>Marasmius</i>     | 6.09E+01                 | 1.03E-02             |
| <i>Filoboletus</i>  | 4.85E+01                 | 1.12E-02             | <i>Marasmius</i>     | 2.41E+01                 | 1.78E-02             | <i>Xeromphalina</i>  | 2.76E+01                 | 2.27E-02             |
| <i>Fomitopsis</i>   | 1.24E+02                 | 4.36E-03             | <i>Laetiporus</i>    | 9.79E+01                 | 4.33E-03             | <i>Auricularia</i>   | 3.76E+01                 | 1.65E-02             |
| <i>Pholiota</i>     | 4.21E+01                 | 1.27E-02             | <i>Marasmiellus</i>  | 2.13E+02                 | 1.99E-03             | <i>Neolentinus</i>   | 2.83E+01                 | 2.19E-02             |
| <i>Polyporus</i>    | 2.60E+01                 | 2.06E-02             | <i>Pleurotus</i>     | 2.17E+02                 | 1.93E-03             | <i>Pholiota</i>      | 4.18E+01                 | 1.48E-02             |
| <i>Ganoderma</i>    | 1.28E+02                 | 4.11E-03             | <i>Unknown</i>       | 1.30E+01                 | 3.21E-02             | <i>Marasmius</i>     | 4.27E+01                 | 1.30E-02             |
| <i>Micromphale</i>  | 2.48E+01                 | 2.11E-02             | <i>Laetiporus</i>    | 3.76E+01                 | 1.06E-02             | <i>Unknown</i>       | 2.75E+01                 | 2.03E-02             |
| <i>Hypholoma</i>    | 6.16E+01                 | 8.47E-03             | <i>Marasmius</i>     | 4.97E+01                 | 7.66E-03             | <i>Auricularia</i>   | 4.40E+01                 | 1.26E-02             |
| <i>Pleurotus</i>    | 3.98E+01                 | 1.31E-02             | <i>Leucoagaricus</i> | 1.06E+02                 | 3.52E-03             | <i>Collyiba</i>      | 4.34E+01                 | 1.28E-02             |
| <i>Scleroderma</i>  | 3.98E+01                 | 1.31E-02             | <i>Laetiporus</i>    | 1.04E+02                 | 3.33E-03             | <i>Polyporus</i>     | 1.46E+02                 | 3.78E-03             |

|                      |          |          |                     |          |          |                    |          |          |
|----------------------|----------|----------|---------------------|----------|----------|--------------------|----------|----------|
| <i>Fistulina</i>     | 5.11E+01 | 1.02E-02 | <i>Unknown</i>      | 8.82E+00 | 3.93E-02 | <i>Mycena</i>      | 4.81E+01 | 9.97E-03 |
| <i>Neolentinus</i>   | 4.99E+01 | 1.03E-02 | <i>Unknown</i>      | 1.90E+01 | 1.74E-02 | <i>Unknown</i>     | 3.42E+02 | 1.39E-03 |
| <i>Micromphale</i>   | 5.02E+01 | 1.00E-02 | <i>Xeromphalina</i> | 3.54E+01 | 4.84E-03 | <i>Lentinus</i>    | 6.37E+01 | 7.34E-03 |
| <i>Crepidotus</i>    | 1.18E+02 | 4.26E-03 | <i>Clitocybe</i>    | 1.16E+01 | 1.34E-02 | <i>Neolentinus</i> | 7.93E+01 | 5.87E-03 |
| <i>Hohenbuehelia</i> | 3.03E+01 | 1.65E-02 | <i>Agaricus</i>     | 2.53E+02 | 5.80E-04 | <i>Lentinula</i>   | 4.78E+01 | 9.67E-03 |
| <i>Laetiporus</i>    | 4.28E+01 | 1.16E-02 | <i>Gymnopilus</i>   | 4.32E+01 | 1.13E-02 | <i>Lentinula</i>   | 5.58E+01 | 8.15E-03 |
| <i>Gymnopus</i>      | 6.23E+01 | 8.00E-03 | <i>Unknown</i>      | 1.51E+02 | 3.20E-03 | <i>Marasmius</i>   | 7.89E+01 | 5.70E-03 |
| <i>Unknown</i>       | 9.17E+01 | 5.39E-03 | <i>Lentinus</i>     | 8.36E+01 | 5.76E-03 | <i>Marasmius</i>   | 2.73E+01 | 1.64E-02 |
| <i>Lentinula</i>     | 5.35E+01 | 8.96E-03 | <i>Mycena</i>       | 6.10E+01 | 7.88E-03 |                    |          |          |
